# Supplementary material for: Factor XII and uPAR upregulate neutrophil functions to influence wound healing
Source: JCI journal article supplement (doi:10.1172/jci92880), 2018-01-28

## 1 **Supplemental Methods**

2 *Reagents.* N-formyl-methionyl-leucyl-phenylalanine (fMLP), LY294002 [2-(4-morpholinyl)-8-  
3 phenyl-4H-1-benzopyran-4-one, Akt2 inhibitor (Akti XII) were purchased from Calbiochem.  
4 Wortmannin was obtained from Cell Signaling Technology. S-2302 (H-D-prolyl-L-phenylalanyl-  
5 L-arginine-p-nitroaniline) was purchased from Diapharma. Probenecid, adenosine 5'-triphosphate  
6 (ATP), Ionomycin, N,N,N',N'-tetrakis-(2-pyridylmethyl)-ethylenediamine (TPEN), phorbol-12-  
7 myristate-13-acetate (PMA), gelatin and monoclonal anti-beta-actin antibody (A5441/AC-15)  
8 were purchased from Sigma. Purified mouse uPAR was purchased from My BioSource.  
9 Electrochemiluminescence western blotting detection reagents were purchased from  
10 ThermoFisher. CM5 chip, ethanolamine, EDC, NHS and HBS-P buffer were from GE Healthcare  
11 Life Sciences. Human FXII (1.26 mg/ml) was purchased from Haematologic Technologies Inc.  
12 Recombinant mouse FXII (0.51 mg/ml) was purchased from Innovative Research. Thioglycolate  
13 modified Brewer medium was from BD Biosciences. Sytox Green and Fluo-4-AM were purchased  
14 from Life Technologies. siRNA to hepatic FXII was generously provided by Alnylam  
15 Pharmaceuticals, Inc. PE-conjugated rat anti-mouse antibody to F4-80 (12-4801-80/BM8), rat  
16 anti-mouse to  $\alpha$ M (12-0112-82/M1/70), PE rat IgG 2 $\alpha$ k isotype control (12-432-42/eBR2a) were  
17 from eBioscience. PerCP-Cy 5.5-conjugated rat anti-mouse antibody against CD11b  
18 (550993/M1/70) and PerCP-Cy 5.5 rat IgG2b  $\kappa$  isotype control (550764/A95-1) were from BD  
19 Pharmingen. For immunostaining, purified rat anti-mouse antibody to CD11b (553308/M1/70)  
20 was purchased from BD Pharmingen; rat anti-mouse antibody to Ly6G (BE 0075-1/1A8) was from  
21 Bio X Cell; rabbit polyclonal antibody to Citrullinated Histone H3 (citrulline R2 + R8 + R17,  
22 ab1791) was purchased from Abcam. A23187 was also purchased from Abcam. Alexa Fluor 488-  
23 [donkey anti-rat (A21208), donkey anti-rabbit (A21206)] and 594-conjugated [donkey anti-rat

1 (A21209)] antibodies were obtained from ThermoFisher. Polyclonal antibody to total Akt (9272),  
2 phospho-Akt (Ser473; 9271) and phospho-Akt2 (Ser474; 8599) were purchased from Cell  
3 Signaling Technology. Primary polyclonal antibody against human FXII (GAFXII-AP) was from  
4 Affinity Biologicals. Mouse control IgG (2025), primary polyclonal antibody against mouse FXII  
5 (56750/G-20), CD31 (PECAM-1; 18916/MEC 13.3) and mouse monoclonal antibody to uPAR  
6 (376494/E-3) were purchased from Santa Cruz Biotechnology. 4'6'-diamidino-2-phenylindole,  
7 dilactate (DAPI) was purchased from Vector Laboratories. Signaling medium (serum-free without  
8 growth factors) was purchased from Cell Systems. DMEM/F12-10 medium was from  
9 ThermoFisher. Reduced growth factor matrigel was purchased from Corning. Pierce protein G  
10 agarose beads were purchased from ThermoFisher. CytoSelect 24-well cell migration kits (3  $\mu$ m,  
11 fluorometric), and Cytoselect 48-well cell adhesion kits (ECM array, fluorometric), were  
12 purchased from Cell Biolabs, Inc. Mouse neutrophil and monocyte isolation kits were purchased  
13 from Miltenyi Biotec. LRG20 peptide was synthesized at the Department of Cellular and  
14 Molecular Medicine, Cleveland Clinic.

15 *Skin wound assays.* Full-thickness excisional wounds were made on the dorsal skin of mice under  
16 aseptic conditions. A fold of the dorsal skin was then picked up and punched with a 5-mm  
17 disposable sterile biopsy punch (Acu Punch). Two wounds were generated per mouse. External  
18 wound area was determined using an electronic caliper. Wounds were considered closed when  
19 their area relative to day 0 was less than 5%. Area was calculated with the formula: area=  $\frac{1}{4}$  x  
20 length x width x 3.14. Wounds were harvested on Days 2 and 5. Skin sections from Day 2 or 5  
21 wounds were embedded in optimal cutting temperature compound (OCT) (Tissue-Tek) and flash-  
22 frozen in liquid nitrogen. Ten  $\mu$ m thick sections were obtained by cryostat for immunofluorescence  
23 staining. The coverslips were mounted with DAPI. Photomicrographs were viewed on a Nikon

1 Eclipse TE2000-S microscope with a QImaging Retiga 2000R, Fast 1394 camera at final  
2 magnification as indicated in each figure. For all immunofluorescence and immunohistochemistry  
3 experiments, parallel sections were stained with only primary or secondary antibody as a control.  
4 ImageJ (NIH) analysis was used to determine CD11b, Ly6G, or H3Cit stained cells per high power  
5 field (HPF) or CD31 (PECAM) stained area/HPF.

6 Day 5 skin wounds also were harvested, fixed in 4% paraformaldehyde, embedded in paraffin and  
7 stained with hematoxylin and eosin (H&E). Photomicrographs of the sections were obtained on a  
8 Leica SCN 400 Slide Scanner equipped with a Hamamatsu line sensor color camera and a  
9 40X/0.65 objective. Re-epithelialization of the wounds was quantitated in a standardized manner  
10 allowing for small differences in original wound size between mice that occur due to experimental  
11 variability. The wound gap, defined as the distance between the two epithelial tongues (i.e. the  
12 keratinocytes migrating into the wound bed) was measured and subtracted from the total length of  
13 the original wound size (i.e. the distance between the normal skin/wounded skin border on each  
14 side of the lesion) to provide the total re-epithelialization length. This number was then divided by  
15 the original length of the wound to supply the percent re-epithelialization. Therefore, each wound  
16 was internally controlled by taking into consideration the original wound size.

17 WT or *Bdkrb2*<sup>-/-</sup> mice were wounded as described above and wounds were harvested for  
18 immunofluorescence studies, on Days 2 and 5. Another group of *Bdkrb2*<sup>-/-</sup> mice had an osmotic  
19 pump placed (ALZET Model 1002, ALZET Corp., Cupertino, CA) such that saline or 1 mg/kg/day  
20 of bradykinin 1 receptor antagonist (R715) (Tocris Bioscience) was administered for 14 days.  
21 Wounds were created eight days after osmotic pump placement and were similarly harvested on  
22 Days 2 and 5 after wounding, for immunofluorescence studies.

1 For immunohistochemistry, Day 2 skin wounds were stained with antibodies against NE or double  
2 stained with antibodies against NE and pAktS<sup>473</sup> (4060L, Cell Signaling). Antigen retrieval was  
3 performed with citrate buffer (Vector Laboratories) using a pressure cooker (Dako). First, slides  
4 were blocked with peroxidase, washed with PBS and subsequently blocked in normal goat serum  
5 (1:20, S-1000, Vector Laboratories) for 1 h at room temperature. Tissue was stained with a primary  
6 antibody against pAktS<sup>473</sup> (1:50) overnight at 4°C. The following day, tissue was incubated with  
7 horse-radish peroxidase-conjugated anti-rabbit secondary antibody (K4010, Dako) for 1 h at room  
8 temperature and visualized by DAB (Dako) oxidation reaction. Denaturing Solution (DNS001L,  
9 Biocare Medical) was used to remove any remaining first primary antibody. Slides were washed  
10 with PBS. NE (1:100), was applied to the tissue using the same procedure and visualized by Fast  
11 Red (Enzo Life Sciences) or Vina Green (Biocare Medical). Tissue sections were counterstained  
12 with hematoxylin, dehydrated with ethanol, and mounted with Permount (ThermoFisher).

13 *Sterile peritonitis assays.* Peritonitis was induced by intraperitoneal injection of 1 ml of 5%  
14 (wt/vol) Brewer Thioglycolate (TG) Medium. At 4 h or 72 h, peritoneal cells were harvested by  
15 injection of 5 ml PBS into the peritoneum. Loaded mice were briefly massaged and 4 ml of this  
16 lavage fluid was collected with a 25 g needle, followed by a second aspiration step with a Pasteur  
17 pipette to collect any remaining fluid from the peritoneal cavity. Peritoneal lavage fluid was  
18 dispensed into a 50 ml conical centrifuge tube on ice and centrifuged for 10 min at 400 g. The  
19 supernatant was discarded and cells were resuspended in 200 µl cold DMEM/F12-10 solution.  
20 Peritoneal exudative cells were counted on a hemacytometer with trypan blue. PEC were also  
21 transferred on a glass slide and stained with Wright-Giemsa stain for manual differential counting.

22 *siRNA studies.* Lipid nanoparticle-formulated F12 siRNA (0.47 mg/ml) (Alnylam  
23 Pharmaceuticals) and luciferase siRNA (0.38 mg/ml) were diluted in 1X PBS prior to each use.

1 Formulations were administered by i.v. tail vein injection at a 10  $\mu$ l/g volume. WT mice received  
2 *F12* siRNA and luciferase siRNA at a dose of 0.1 mg/kg. Mice were sacrificed at 8 h, 12 h, 24 h,  
3 daily from Day 2 to 7, on Day 10. Liver was harvested for real-time PCR and blood was collected  
4 by IVC venipuncture for coagulation assays and immunoblotting. A different group of WT mice  
5 were treated with *F12* siRNA and luciferase siRNA and were wounded 24 h later. Wounds were  
6 harvested on Days 2 and 5 for immunofluorescence studies. *F12*- and luciferase-siRNA-treated  
7 mice were also subjected to TG-induced peritonitis. Peritoneal exudate fluid was harvested 4 h  
8 after thioglycolate instillation and the # of PECs was determined as above.

9 *Flow cytometry.* Peritoneal lavage fluid was collected 4 h after TG instillation and centrifuged for  
10 10 min at 400 g. Cells were resuspended in 1 ml PBS/10% fetal bovine serum (FBS) to a final  
11 concentration of  $1 \times 10^6$  cells/ml and incubated for 30 min with 1  $\mu$ g/ml PerCP-Cy 5.5 anti-CD11b  
12 and PE-conjugated anti-F4/80 antibodies. Cells were fixed and flow cytometry was performed on  
13 a BD FACS LSR II equipment. Neutrophils were detected by CD-11b positive, F4-80 negative  
14 staining. Antibody specificity was verified using an appropriate isotype-labeled antibody (anti-rat  
15 IgG2b,  $\kappa$ ), 1  $\mu$ g/ml. Similarly, peripheral neutrophils ( $2 \times 10^6$  cells/ml) were resuspended in  
16 DMEM/F12/10, stimulated with or without 30  $\mu$ M fMLP or 62 nM FXII/10  $\mu$ M  $Zn^{2+}$  for 5 min  
17 and incubated with 10  $\mu$ g/ml of PE-conjugated control IgG or anti- $\alpha$ M antibodies for 15 min. Cells  
18 were fixed and analyzed on a BD FACS LSR II equipment.

19 *FXII reconstitution experiments.* Purified human FXII or recombinant mouse FXII were  
20 administered by tail vein injection to *F12*<sup>-/-</sup> mice to make the plasma concentration of FXII 450  
21 and 650 nM, respectively. Mice were immediately subjected to TG-induced peritonitis. Peritoneal  
22 exudate fluid was harvested at 4 h and the number of PEC was determined. At the time of sacrifice,  
23 blood was collected by IVC venipuncture for coagulation assays.

1 *Preparation of mouse neutrophils and monocytes from bone marrow.* Bone marrow was harvested  
2 from both femurs and tibias of donor mice and collected in PBS. The cell suspension was  
3 centrifuged at 400 g for 10 min and resuspended in DMEM/F12-10. Cells were then applied on a  
4 three-layer Percoll gradient of 78%, 69%, and 52% Percoll (Cosmo Bio USA), respectively,  
5 diluted in DMEM/F12-10, and centrifuged at 1500 g for 30 min. We obtained  $6 \pm 0.6 \times 10^6$  cells  
6 per mouse, and  $93 \pm 2\%$  of them were morphologically mature neutrophils.

7 Bone marrow-derived monocytes were isolated with magnetic bead separation system (Miltenyi  
8 Biotec) according to the manufacturer's instructions. The eluted cells were used for cDNA  
9 preparation and FXII sequencing, described below.

10 *cDNA preparation, FXII sequencing and mRNA studies.* Total mRNA was isolated from  
11 homogenized mouse livers or bone marrow-derived neutrophils and monocytes using the TRIZOL  
12 chloroform method and first strand cDNA was synthesized with Superscript III reverse  
13 transcriptase (ThermoFisher). All samples were processed in duplicate. To control for genomic  
14 contamination in samples, the reaction was also carried out in the absence of reverse transcriptase.  
15 PCR premixtures were prepared from TaqMan Universal Mastermix, water, and solutions of  
16 primers. PCR was performed with 1  $\mu$ l of cDNA samples or water (control) using 3 pairs of  
17 sequential, overlapping primers to the coding *F12* region. The cycling conditions were: 2 min at  
18 50° C, 5 min at 95° C, 35 cycles with 1 min at 95° C and 45 s at 54° C. PCR products were sequenced  
19 by the Genomics Core Facility at CWRU using the same primers. Nucleotide sequence results  
20 were uploaded in the Basic Local Alignment Search Tool (BLAST) and identified murine FXII  
21 cDNA in BM-derived neutrophils. Real-time PCR was performed on iCycler IQ5 with sybergreen  
22 (BioRad). **Relative *F12* expression, normalized to control gene (18S), was determined by:**

23 **Fold change =  $2^{-\Delta\Delta Ct}$**

1 Where  $\Delta\Delta C_t = (C_{t\text{ F12}} - C_{t\text{ 18S}}) - \text{average}(C_{t\text{ F12}} - C_{t\text{ 18S}})$ , as previously described (31).

2 *Creation of FXII variants.* FXII cDNA was introduced into pcDNA3.1+ vector and expressed in  
3 HEK293 cells under serum-free conditions. In addition to wild type FXII (rFXII WT), variants  
4 were made with proline substituting for arginine at 353 (FXII Locarno, FXII-353P) or a double  
5 variant (FXII-D) with combined R353P and alanine replacing the active site serine (S544A). The  
6 supernatant was collected 48 h after transfection, concentrated with Amicon Ultra centrifugal  
7 filters (30K, EMD Millipore), resolved on SDS-PAGE, and the recombinant FXII variants were  
8 detected with anti-FXII antibody under reducing conditions. Conditioned media from non-  
9 transfected (henceforth called “mock”) and transfected cells (labeled as “media”) were also  
10 collected, handled as above, and used in coagulation assays and signaling experiments.

11 *In vitro functional assays.* In order to obtain purified, resting, non-stimulated neutrophils for  
12 immunoblotting and *in vitro* functional assays, whole blood (500  $\mu$ l) was subjected to red cell lysis  
13 with double distilled H<sub>2</sub>O (9 parts) and 10X PBS (1 part), the reaction was stopped immediately  
14 by the addition of serum-free media and the mixture was centrifuged at 300 g for 10 min at room  
15 temperature. Cells were filtered through a sterile MACS 30- $\mu$ m pre-separation filter to remove cell  
16 clumps, and neutrophils were separated by negative selection using the MACS magnetic bead  
17 separation system (Miltenyi Biotec) according to the manufacturer's instructions. The filtered cells  
18 were incubated with a cocktail of biotin-conjugated monoclonal antibodies against antigens that  
19 are not expressed on neutrophils in PBS containing 1% BSA for 10 min at 4° C, followed by anti-  
20 IgG microbeads for 15 min at 4° C. Cells were then loaded onto MS columns connected to the  
21 MACS magnet. The eluted cells were resuspended in 1 ml of DMEM/F12-10 medium containing  
22 0.5% BSA, 2 mM CaCl<sub>2</sub> and 2mM MgCl<sub>2</sub> for *in vitro* functional assays; and in serum-free medium

1 without growth factors for signaling and immunoblotting. Neutrophils were stimulated for 5 min  
2 with 10  $\mu$ M fMLP and 62 nM FXII/10  $\mu$ M  $Zn^{2+}$ , unless otherwise stated.

3 *Static neutrophil adhesion assays.* WT and *F12<sup>-/-</sup>* neutrophils, 1 x 10<sup>6</sup>/ml, in DMEM/F12-10  
4 containing 0.5% BSA, 2 mM CaCl<sub>2</sub> and 2mM MgCl<sub>2</sub>, were incubated with or without fMLP in  
5 BSA-coated and fibrinogen pre-coated plates. After 60 min incubation at 37°C, media was  
6 carefully discarded from each well and cells were gently washed 3 times with PBS. Lysis buffer  
7 (1X)/CyQuant dye solution were added to each well containing cells in 1:300 ratio and allowed to  
8 incubate for 20 min at room temperature with shaking. The mixture containing cells, was  
9 transferred to a 96-well plate and fluorescence was determined in a NOVOstar plate reader (BMG-  
10 Labtech) with excitation set at 480 nm and emission at 520 nm.

11 *Microfluidic channel chemotaxis.* The microfluidic devices were fabricated by means of a  
12 lamination based technique (89). Briefly, a rectangular polymethylmethacrylate (PMMA) top  
13 piece was attached onto a glass microscope slide by using a biocompatible double-sided adhesive  
14 (DSA), which is sandwiched in between the two parts. Prior to lamination, two DSA films (50  $\mu$ m)  
15 were attached on the bottom and top surfaces of a PMMA sheet (200  $\mu$ m) to obtain a separation  
16 gap of 300  $\mu$ m between the PMMA and glass slide. Following adhesive preparation, the 300  $\mu$ m  
17 thick film was fixed on a glass slide while the upper part was still covered with a liner and a 10  $\mu$ l  
18 of matrigel stock solution was perfused over the slide on ice so that it covered the surface confined  
19 by the DSA film. Two  $\mu$ l each of chemoattractant solution (media, 2.5  $\mu$ M fMLP, or 62 nM FXII  
20 containing 10  $\mu$ M  $Zn^{2+}$ ) was applied into a pocket created in each channel with fluorescent beads  
21 to clearly mark the interphase. After a short period of incubation at room temperature, the top liner  
22 of the DSA film was removed and a 3.175 mm thick PMMA top piece was fixed onto the surface-  
23 functionalized glass slides by forming three separate channels each with an inlet and outlet hole.



1 Once the microfluidic devices were prepared, they were placed on a fully motorized inverted  
2 microscope (Olympus, model: IX83). A total number of  $1 \times 10^6$  neutrophils obtained were loaded  
3 into the channels and allowed to adhere to the matrigel surface for 10 min. Thereafter, the bright  
4 field images in the vicinity of matrigel/chemoattractant interphases were recorded at 5 minute  
5 intervals for each channel up to 120 min at 20X magnification.

6 *Mouse peripheral blood neutrophil and monocyte isolation.* Murine peripheral blood was drawn  
7 by IVC venipuncture into sodium citrate tubes (ratio: 1 part anticoagulant to 9 parts whole blood).  
8 Peripheral monocytes were isolated with a magnetic bead separation system (Miltenyi Biotec)  
9 according to the manufacturer's instructions. The eluted cells were resuspended in serum-free  
10 medium without growth factors for immunoblotting. Neutrophils were isolated with  
11 Polymorphprep gradient (3, 4). For immunofluorescence studies,  $1 \times 10^6$ /ml neutrophils were  
12 resuspended in serum-free DMEM/F12-10 containing 2 mM  $\text{CaCl}_2$  and 2 mM  $\text{MgCl}_2$ , plated in 35  
13 mm glass-bottom dishes No 1.5 (MatTek Corporation) and incubated with media or fMLP (10  $\mu\text{M}$ ,  
14 unless otherwise stated) for 2 h. Cells were subsequently fixed with 4% formalin for 4 min, washed  
15 in PBS, permeabilized with Triton X-100 0.3% in 0.3% BSA for 3 min. Next, cells were blocked  
16 with 3% BSA for 1 h and incubated with primary antibody against a peptide from the C-terminus  
17 of FXII of mouse origin (8  $\mu\text{g}/\text{ml}$ ) at 4 °C overnight. Cells were then incubated with a donkey anti-  
18 goat antibody (1:750 dilution) conjugated with Alexa Fluor 488 for 1 h at room temperature.  
19 Coverslips were mounted with DAPI. Fluorescent images were obtained using a Nikon TE2000-  
20 S microscope at magnifications indicated in each figure legend. In some experiments, cells were  
21 fixed but not permeabilized before they were stained with the antibodies.

22 *Human neutrophil isolation and immunofluorescence studies.* Blood was drawn from three healthy  
23 individuals and a FXII deficient individual after their written informed consent. Neutrophils were

1 isolated as murine neutrophils using Polymorphprep gradient. For immunofluorescence studies, 1  
2  $\times 10^6$ /ml neutrophils were similarly processed but stimulated with 1  $\mu$ M fMLP and incubated with  
3 primary antibody against human FXII (1  $\mu$ g/ml) at 4°C overnight. Cells were then incubated with  
4 a donkey anti-goat antibody (1:750 dilution) conjugated with Alexa Fluor 488 for 1 h at room  
5 temperature. Coverslips were mounted with DAPI. Images were acquired on a Zeiss 510 confocal  
6 microscope at various magnifications as indicated in each figure. In some experiments, cells were  
7 fixed but not permeabilized before they were stained with the antibodies.

8 *Murine CBC.* Mouse complete blood counts were measured in 50  $\mu$ l of whole blood on a  
9 HEMAVET analyzer according to the manufacturer's instructions.

10 *Coagulation assays.* The activated partial thromboplastin time (aPTT) was performed by mixing  
11 50  $\mu$ l thawed citrated plasma with 50  $\mu$ l pre-warmed aPTT reagent (Helena Laboratories) in a glass  
12 tube and incubated for 5 min at 37°C. The reaction was initiated by adding 50  $\mu$ l of 35.3 mM  
13  $\text{CaCl}_2$ . The endpoint clotting time was determined visually by constantly tilting the cuvette in a  
14 37°C water bath. The prothrombin time (PT) was similarly performed by the addition of 100  $\mu$ l of  
15 pre-warmed PT reagent (Thromboplastin Reagent, Helena) to 50  $\mu$ l thawed citrated in a glass tube.  
16 Factor XII assays were performed using FXII-deficient plasma as substrate in an aPTT-based  
17 coagulant assay. FXII deficient plasma was obtained from George King.

18 *Chromogenic assay.* Neutrophils were seeded at  $1 \times 10^6$  cells per well in a gelatin-coated 96-well  
19 plate in DMEM/F12-10 containing 2 mM  $\text{CaCl}_2$  and 2 mM  $\text{MgCl}_2$ , incubated in the absence or  
20 presence of 10  $\mu$ M fMLP, 62 nM FXII/10  $\mu$ M  $\text{Zn}^{2+}$ , or increasing concentrations of FXIIa (0.62  
21 nM, 6.2 nM, 62 nM) and 10  $\mu$ M  $\text{Zn}^{2+}$ . In each well, 200 mM S-2302 was added and optical density  
22 (OD) at 405 nm was continuously monitored over 180 min on a NOVostar microplate reader.

1 *Surface plasmon resonance studies.* Real-time biomolecular interaction analysis was performed  
2 using a BiaCore 3000 instrument (GE Healthcare, Piscataway, New Jersey). Purified mouse uPAR  
3 was covalently linked at pH 5.0 in 10 mM sodium acetate buffer to a CM5 Chip using EDC/NHS  
4 amine coupling of the primary amine of the protein to a carboxyl group of a chip linked  
5 carboxymethylated dextran using HBS-P running buffer (10 mM HEPES, 0.15 M NaCl, 0.005%  
6 polysorbate 20, pH 7.4) at 25°C. In order to prevent FXII binding onto the chip's dextran surface,  
7 0.05% gelatin solution was injected over coated chip. Ethanolamine was used to block unwanted  
8 carboxy groups after linkage (flow rate was 30 µl/min). An ethanolamine blocked Fc1 was used  
9 as blank for background subtraction of any non-specific response to the derived dextran chip. In  
10 kinetic determinations, rising concentrations of FXII (0 nM, 1 nM, 100 nM, 400 nM), in the  
11 absence or presence of 10 µM Zn<sup>2+</sup> were produced from a stock solution using the BiaCore  
12 software. Kinject was used for injection. Flow rate was 30 µl/min. The running buffer used was  
13 BiaCore HBS-P (10 mM HEPES, 0.15 M NaCl, 0.005% polysorbate 20, pH = 7.4). After each  
14 analyte injection, the chip surface was regenerated with ethanolamine injection. For affinity  
15 constant determinations, merging of triplicate injections of each concentration was performed to  
16 obtain a single sensorgram line at each concentration. A Lang-muir binding model with local fit  
17 (stoichiometry of 1:1) was used to analyse *kon* (association rate constant), *koff* (dissociation rate  
18 constant) and KD (equilibrium dissociation constant).

19 *Neutrophil signaling studies*

20 *Cell-supernatant studies.* WT neutrophils (PMNs) were washed in serum-free media without  
21 growth factors and either processed immediately (untreated; UT) or stimulated with 2.5 µM fMLP  
22 for 1, 2, and 5 min. Cells were centrifuged at 2,000g for 5 min. The cell pellet and supernatant  
23 were separated and mixed with 2X Laemmli sample buffer which was reduced with 5% β-

1 mercaptoethanol. Cell lysates and supernatant were loaded, resolved, and transferred onto  
2 nitrocellulose. The membranes were incubated with purified primary polyclonal FXII antibody  
3 (1:1000 dilution) for 1 h. The primary antibody was detected with a horseradish peroxidase–  
4 conjugated anti–goat immunoglobulin G (1:5000) for 1 h. The membranes were developed using  
5 the Odyssey Infrared Imaging System.

6 *FXII immunoblotting.* Wild type neutrophils (PMNs) were incubated in the absence (UT) or  
7 presence of 62 nM FXII and 10  $\mu\text{M}$   $\text{Zn}^{2+}$  for 1, 2 and 5 min. The reaction was stopped by the  
8 addition of 1 mM p-A-phenylmethylsulfonyl fluoride (APMSF) and protease inhibitor cocktail  
9 (Roche). Western blot analysis for FXII was performed under reduced and non-reduced conditions  
10 using polyclonal anti-FXII antibody. Full-length FXII was a single band at  $\sim$  78 kDa under  
11 reducing conditions. When cleaved to FXIIa, the heavy chain was 52 kDa under reduced  
12 conditions.

13 *Immunoblotting.* For AktS<sup>473</sup> and AktS<sup>474</sup> immunoblotting, neutrophils were washed in serum-free  
14 media without growth factors and unless stated otherwise, some aliquots were pretreated with 50  
15 nM Wortmannin, 100  $\mu\text{M}$  LY294002, 10  $\mu\text{M}$  Akti-XII, 10  $\mu\text{M}$  TPEN, or 300  $\mu\text{M}$  LRG20. Then,  
16 cells were incubated with 62 nM FXII in the absence or presence of 10  $\mu\text{M}$   $\text{Zn}^{2+}$ , 10  $\mu\text{M}$  fMLP or  
17 vehicle for 5 to 7 min. Following stimulation, cells were treated at 4°C with RIPA lysis buffer  
18 containing protease inhibitor mixture (Roche) supplemented with  $\text{NaVO}_3$  (1 mM), leupeptin (25  
19  $\mu\text{M}$ ), pepstatin (25  $\mu\text{M}$ ), aprotinin (25  $\mu\text{M}$ ), NaF (25 mM), levamisole (1 mM), PMSF (1 mM),  
20 and 1% (wt/vol) NP-40. In all cases, cells lysates were mixed with 2X Laemmli sample buffer  
21 which was reduced with 5%  $\beta$ -mercaptoethanol. Equal amounts of protein were subjected to 10%  
22 sodium dodecyl sulfate–polyacrylamide gel electrophoresis and then electroblotting onto  
23 polyvinylidene difluoride (PVDF) membrane. Membranes were blocked with 5% (wt/vol) nonfat

1 dried milk in TBST and incubated overnight at 4°C with antibodies to phospho-Akt (Ser<sup>473</sup>),  
2 phospho-Akt2 (Ser<sup>474</sup>) or anti-Akt (1:1000 dilution in 3% BSA in TBST). Primary antibodies were  
3 detected with a horseradish peroxidase–conjugated anti–rabbit immunoglobulin G (1:5000) for 1  
4 hour at room temperature. The blots were scanned using Scion Image (v4.0) software. The band  
5 density of untreated (UT) samples was considered zero percent; band density of fMLP-treated  
6 samples subtracted from UT cell band density was set at 100%. Test sample or lane density (%  
7 Relative Densitometry Units or % RDU) was determined as follows:

$$8 \quad (\text{Test sample RDU} - \text{UT RDU}) / (\text{fMLP RDU} - \text{UT RDU}) \times 100 = \% \text{ RDU}.$$

9 For H3-C immunoblotting, cells were placed on ice after activation with 10 μM fMLP, 1μM PMA,  
10 or 62 nM FXII/10 μM Zn<sup>2+</sup> for 2 hours and similarly treated with RIPA lysis buffer. Cells were  
11 then sonicated three times, 10 seconds each, using an aquasonic sonicator (Fisher Scientific  
12 Ultrasonic Bath 5.7L at the highest power setting) and centrifuged at 20,000 g for 30 min to remove  
13 insoluble particles. The samples were then incubated with an equal volume of 2X Laemmli sample  
14 buffer which was reduced with 5% β-mercaptoethanol. The transferred blots were blocked with  
15 5% (wt/vol) nonfat dried milk in TBST for 1 h at room temperature. The antibodies used were  
16 anti-H3-C (1mg/ml, 1:10000 dilution) and anti-beta-actin (2.6 mg/ml, 1:10000 dilution). Blots  
17 were scanned using Scion Image (v4.0) software. The band density of untreated samples was used  
18 to calculate the fold increase in H3-C among treated samples on the same immunoblot.

### 19 *Neutrophil chemotaxis migration assays*

20 *Boyden chamber chemotaxis.* Wild type and *F12<sup>-/-</sup>* neutrophils, 1 x 10<sup>6</sup>/ml, resuspended in  
21 DMEM/F12-10 containing 0.5% BSA, 2 mM CaCl<sub>2</sub> and 2mM MgCl<sub>2</sub>, were applied to the top insert  
22 of a Boyden chamber (3 μm pore size). Media containing fMLP was added to the lower well and  
23 the chambers were incubated for 1 h. Next, media was aspirated from the top and the insert itself

1 was transferred to a clean well containing cell detachment solution and incubated for 30 min at  
2 37°C. Medium containing migratory cells was mixed well and transferred to a 96-well plate. Lysis  
3 buffer (4X)/CyQuant GR dye solution were added to each well containing cells in 1:75 ratio and  
4 allowed to incubate for 20 min at room temperature. Fluorescence was determined in a NOVOstar  
5 plate reader at 480/520 nm. Cells ( $1 \times 10^6$ /ml) plated directly at the bottom well served as positive  
6 control (100% neutrophil migration); an empty bottom well containing 4X lysis buffer/CyQuant  
7 GR dye only, served as negative control (0% neutrophil migration). Fluorescence intensity was  
8 subtracted from that of negative control, normalized to the intensity of positive control and  
9 expressed as % neutrophil migration.

10 *Fluo-4-based assay of cytosolic  $[Ca^{2+}]$ .* Wild type neutrophils, resuspended in DMEM/F12-10  
11 containing 0.5% BSA, 2 mM  $CaCl_2$  and 2mM  $MgCl_2$  were briefly washed with PBS prior to the  
12 addition of 1 mM Fluo-4-AM, Pluronic F-127 (premixed with fluo-4-AM in 1:1 proportion by  
13 volume), and 2.5 mM probenecid. After incubation at 37°C for 45 min, cells ( $1 \times 10^6$ /ml) were  
14 plated in a 24-well plate. The plate was placed into the Synergy HT reader preheated to 37°C.  
15 Baseline fluorescence (485 nm excitation  $\rightarrow$  528 nm emission at 30-s intervals) was recorded for  
16 5 min. Cells were then stimulated with 5 mM ATP, 3  $\mu$ M ionomycin, 10  $\mu$ M fMLP, or FXII (62  
17 nM or 100 nM) and 10  $\mu$ M  $Zn^{2+}$ . Changes in 485ex $\rightarrow$ 528em fluorescence were recorded at 30-s  
18 intervals. Assays were terminated by permeabilization of cells with 1% Triton X-100 to quantify  
19 the maximum  $Ca^{2+}$ -dependent fluorescence (*F<sub>max</sub>*) of the Fluo-4 indicator dye. The wells were  
20 then supplemented with 15 mM EGTA/50 mM Tris to chelate  $Ca^{2+}$  and quantify the minimum  
21  $Ca^{2+}$ -independent fluorescence of Fluo-4 (*F<sub>min</sub>*). The *F<sub>max</sub>* and *F<sub>min</sub>* values were used to  
22 calculate the cytosolic  $[Ca^{2+}]$  corresponding to changes in 485ex $\rightarrow$ 528em fluorescence of Fluo-  
23 4 within intact cells as described by Tsien and colleagues (5).

1 *NETosis plate reader assay.* Neutrophils were stimulated with 4  $\mu\text{M}$  A23187, 1  $\mu\text{M}$  phorbol-12-  
2 myristate-13-acetate (PMA), 100 nM fMLP, or 62 nM FXII and 10  $\mu\text{M}$   $\text{Zn}^{2+}$  or 10  $\mu\text{M}$   $\text{Zn}^{2+}$ . Where  
3 indicated, neutrophils were pre-incubated with 5  $\mu\text{M}$  Akti XII or 300  $\mu\text{M}$  LRG20 for 30 min,  
4 before stimulation with FXII/ $\text{Zn}^{2+}$ . Cells were seeded at  $3 \times 10^4$  cells per well in a 96-well plate in  
5 DMEM/F12-10 containing 2 mM  $\text{CaCl}_2$  and 2 mM  $\text{MgCl}_2$ , in the presence of 5  $\mu\text{M}$  Sytox Green  
6 cell-impermeable nucleic acid stain. The fluorescence was measured using NOVOstar microplate  
7 reader at specific time intervals for up to 400 min after the activation of cells. To calculate the  
8 NETotic index, fluorescence readout obtained from cells lysed with 0.5% Triton X-100 was  
9 considered as 100% DNA release, and the index was calculated as the percentage of total value at  
10 each time point. The NETotic rate was calculated from the slope of the linear regression curves of  
11 percent total DNA relative to time.

12 *Bone marrow transplantation.* Bone marrow cells of WT and  $F12^{-/-}$  mice (6-8 weeks old) were  
13 harvested from both femurs and tibias of donor mice and collected in PBS with 2% fetal bovine  
14 serum under sterile conditions. WT and  $F12^{-/-}$  recipient mice underwent lethal irradiation (11 Gy)  
15 before receiving  $12 \times 10^6$  bone marrow cells in 400  $\mu\text{l}$  PBS by tail vein injection. Recipient mice  
16 received water containing enrofloxacin (Baytril, Bayer) for 2 weeks. Six weeks after  
17 transplantation, marrow reconstitution was confirmed by complete blood count analysis of the  
18 transplanted mice.

19

1 **Supplemental Figures**

2 **Supplemental Figure 1.** *Characterization of  $F12^{-/-}$  mice.* (A) Representative separate agarose gels  
3 from polymerase chain reaction showing the genotype of wild type ( $F12^{+/+}$ ), heterozygous ( $F12$   
4  $^{+/-}$ ) and FXII deficient ( $F12^{-/-}$ ) mice run simultaneously.  $F12$ : 152 base pairs (bp), single NEO band  
5 128 bp denotes  $F12^{-/-}$  genotype. (B) aPTT was determined in WT and  $F12^{-/-}$  plasma (n=5-8). (C)  
6 Plasma FXII coagulant activity from WT and  $F12^{-/-}$  mice (n=5-8). (D) Immunoblot for FXII  
7 antigen in murine and human WT and  $F12^{-/-}$  plasmas. This image represents non-contiguous lanes  
8 of the same blot. Each image is representative of n=5 experiments.

9 **Supplemental Figure 2.** *Reduced bradykinin signaling does not influence leukocyte migration*  
10 *into skin wounds.* (A) Number of neutrophils (Ly6G positive cells) per HPF in Day 2 skin wounds  
11 of WT, bradykinin 2 receptor knock-out ( $Bdkrb2^{-/-}$ ), and  $Bdkrb2^{-/-}$  mice treated with the bradykinin  
12 1 receptor antagonist R715 are shown. Data represent mean  $\pm$  SD (n = 6-8 mice per group). p=0.74  
13 vs. WT control mice by one-way ANOVA with Bonferroni correction. (B) Number of neutrophils  
14 in Day 5 skin wounds of WT and bradykinin 2 receptor knock-out ( $Bdkrb2^{-/-}$ ) mice. Data represent  
15 mean  $\pm$  SD (n = 6 mice per group). p=0.18 vs. WT control mice by Student's t-test. Fluorescent  
16 images were obtained using a Nikon TE2000-S microscope, 20X magnification. The number of  
17 Ly6G positive cells in all groups of animals was compared by morphometric analysis using the  
18 NIH ImageJ software. These data indicate that the reduction in plasma bradykinin levels or absence  
19 of its receptors does not account for the reduced neutrophil migration seen in wounds of  $F12^{-/-}$   
20 mice.

21 **Supplemental Figure 3.** *Leukocyte migration in thioglycolate-induced peritonitis.* WT and  $F12^{-/-}$   
22 mice were injected intraperitoneally with thioglycolate (TG) solution. At 72 h, mice were subjected  
23 to peritoneal lavage and the peritoneal exudate cell (PEC) number was determined. WT: n=10,  
24  $F12^{-/-}$ : n=10 (mean  $\pm$  SEM. \*p=0.13 vs. WT control mice by Student's t-test). Since the majority



1 of peritoneal exudate cells at this time point are macrophages, these data show that *F12*<sup>-/-</sup> mice  
2 have normal macrophage infiltration at sites of sterile inflammation at 72 h.

3 **Supplemental Figure 4.** *Plasma FXII activity and Prothrombin Time in F12<sup>-/-</sup> mice reconstituted*  
4 *with recombinant mouse FXII.* (A) Plasma FXII coagulant activity from WT (n=7), *F12*<sup>-/-</sup> (n=7),  
5 and *F12*<sup>-/-</sup> mice reconstituted with recombinant mouse FXII (mFXII) to plasma FXII level of 650  
6 nM, (n=6). Plasma was collected 4 h after reconstitution with mFXII and thioglycolate-induced  
7 peritonitis. Data represent mean ± SEM. \*p<0.001 *F12*<sup>-/-</sup> vs. WT; p=0.0004 *F12*<sup>-/-</sup>+mFXII vs. WT,  
8 one-way ANOVA with Bonferroni correction. (B) Prothrombin Time was determined in plasma  
9 (n=6-7) at the time of peritoneal lavage, 4 h after thioglycolate instillation and mFXII  
10 reconstitution. Data represent mean ± SEM. p>0.99 vs. WT control mice by one-way ANOVA  
11 with Bonferroni correction.

12 **Supplemental Figure 5.** *F12 expression profile in murine neutrophils and macrophages.* (A)  
13 Murine total mRNA was isolated from bone marrow-derived neutrophils (PMNs) of WT, *F12*<sup>-/-</sup>,  
14 and *F12* siRNA-treated WT mice. First strand cDNA was synthesized with Superscript III reverse  
15 transcriptase. The PCR product is shown on an exon 1-6 probe. Images are representative of 3  
16 experiments. (B) Western blot under reduced conditions for FXII was performed using polyclonal  
17 anti-FXII antibody. UT 1-3: untreated peripheral mononuclear cells. fMLP 1-3: peripheral  
18 mononuclear cells stimulated with 10 μM fMLP. Representative blot of n=3 experiments.

19 **Supplemental Figure 6.** *Surface-initiated coagulation in plasma.* The aPTT (sec) time of FXII  
20 deficient (*F12*<sup>-/-</sup>) plasma reconstituted with recombinant WT FXII (n=5) or FXII double mutant  
21 (FXII-D) species that contain combined R353P and S544A mutations (n=5). Each sample was run  
22 in triplicate and data represent mean ± SEM. \*p<0.0001 by Student's t-test.

1 **Supplemental Figure 7.** *Microfluidic channel set-up for live cell neutrophil chemotaxis.* (A) After  
2 a microfluidic device was designed and prepared, it was placed on a fully motorized inverted  
3 microscope (Olympus, model: IX83). A total number of  $1 \times 10^6$  neutrophils obtained from WT,  
4 *F12<sup>-/-</sup>* or *Plaur<sup>-/-</sup>* mice for each experimental group were loaded into the channels and allowed to  
5 settle and adhere to the matrigel surface for 10 min. For each mouse genotype, 3 experimental  
6 groups were performed using media, fMLP, or FXII/Zn<sup>2+</sup> as chemoattractants. Upon initiation of  
7 the assay, the bright field images in the vicinity of matrigel/chemoattractant interphase were  
8 recorded at 5 min intervals for each channel up to 120 min. The acquired images were later  
9 processed using ImageJ (NIH) software to determine the number of neutrophils which had  
10 migrated at the chemoattractant interphase within 120 min. (B) Schematic illustration of a starting  
11 suspension of neutrophils that migrate towards the chemoattractant over 120 min. Neutrophils in  
12 this panel are drawn to scale. (C) To ensure that a clear interphase was formed between the neutral  
13 and chemoattractant-infused matrigel layers, 2- $\mu$ m fluorescent beads were added into the matrigel  
14 along with the chemoattractants. A 10X scan of the channel reveals a clear and homogeneous  
15 distribution of chemoattractant along the side of the channel, which also demonstrates the  
16 existence of a sharp interphase that constituted the target for neutrophils to migrate towards. (D)  
17 Neutrophils were loaded into the channels at a concentration level of  $1 \times 10^6$  cells/mL, which was  
18 found to be the optimal concentration after several trials.

19 **Supplemental Figure 8.** *Neutrophil chemotaxis in a microfluidic channel assay.* Pictures are  
20 representative images acquired at t=2 h.

21 **Supplemental Figure 9.** *Targeting the FXII-uPAR interaction inhibits pAkt2S<sup>474</sup>.* (A) Washed WT  
22 neutrophils were treated with 62 nM FXII and 10  $\mu$ M Zn<sup>2+</sup> for 5 min. Lanes labeled as Akti-XII  
23 and LRG20 were pretreated with Akti-XII (5  $\mu$ M) and LRG20 (300  $\mu$ M) for 30 min, followed by

1 FXII/Zn<sup>2+</sup> treatment. Lysates were immunoblotted with antibodies against pAkt2S<sup>474</sup>. **(B)** Percent  
2 pAkt2S<sup>474</sup> in neutrophils. Untreated (UT) cell band density was considered 0%; band density of  
3 FXII/Zn<sup>2+</sup>-treated cells minus UT cell band density was set at 100%. Data represent mean ± SEM  
4 of 5 experiments (\*p< 0.0001 by one-way ANOVA with Bonferroni correction).

5 **Supplemental Figure 10.** *The influence of bone marrow transplantation on angiogenesis.* **(A)**  
6 CD31 staining on frozen sections from Day 5 skin wounds in WT and KO BM chimeras (n=10  
7 mice in each group). Immunofluorescent images were obtained using a Nikon TE2000-S  
8 microscope at 20X magnification. Scale, 10 μm. **(B)** The area of CD31 staining in all groups of  
9 animals was compared by morphometric analysis using the NIH ImageJ software. \*p=0.01,  
10 \*\*p=0.015, \*\*\*p=0.013, •p=0.019 by one-way ANOVA with Bonferroni correction.

11

1 **Supplemental Video.** Neutrophil chemotaxis in a microfluidic channel.

2

1 **Supplemental Tables**

2 **Supplemental Table 1.** *Hematologic parameters in WT and F12<sup>-/-</sup> mice.* Hematologic parameters  
3 in WT and F12<sup>-/-</sup> mice. Blood cells from WT and F12<sup>-/-</sup> mice were counted using an automated  
4 HEMAVET 950 analyzer (Drew Scientific). Data represent the mean  $\pm$  SD (n = 6 mice per group).  
5 The prothrombin time was performed as indicated in the Methods.

6 **Supplemental Table 2.** *Binding constants of FXII to immobilized uPAR.* Data reflect binding  
7 kinetics in the presence of 10  $\mu$ M zinc. Mean  $\pm$  SD of binding constants from n=3 sensorgrams  
8 using BiaCore Langmuir binding model.

9 **Supplemental Table 3.** *CBC parameters 6 weeks after adoptive bone marrow transfers.* Data  
10 represent the mean  $\pm$  SD (n = 4 mice per group).

11

1  
2  
3  
4  
5  
6  
7  
8  
9  
10  
11  
12  
13  
14  
15  
16  
17  
18  
19  
20  
21

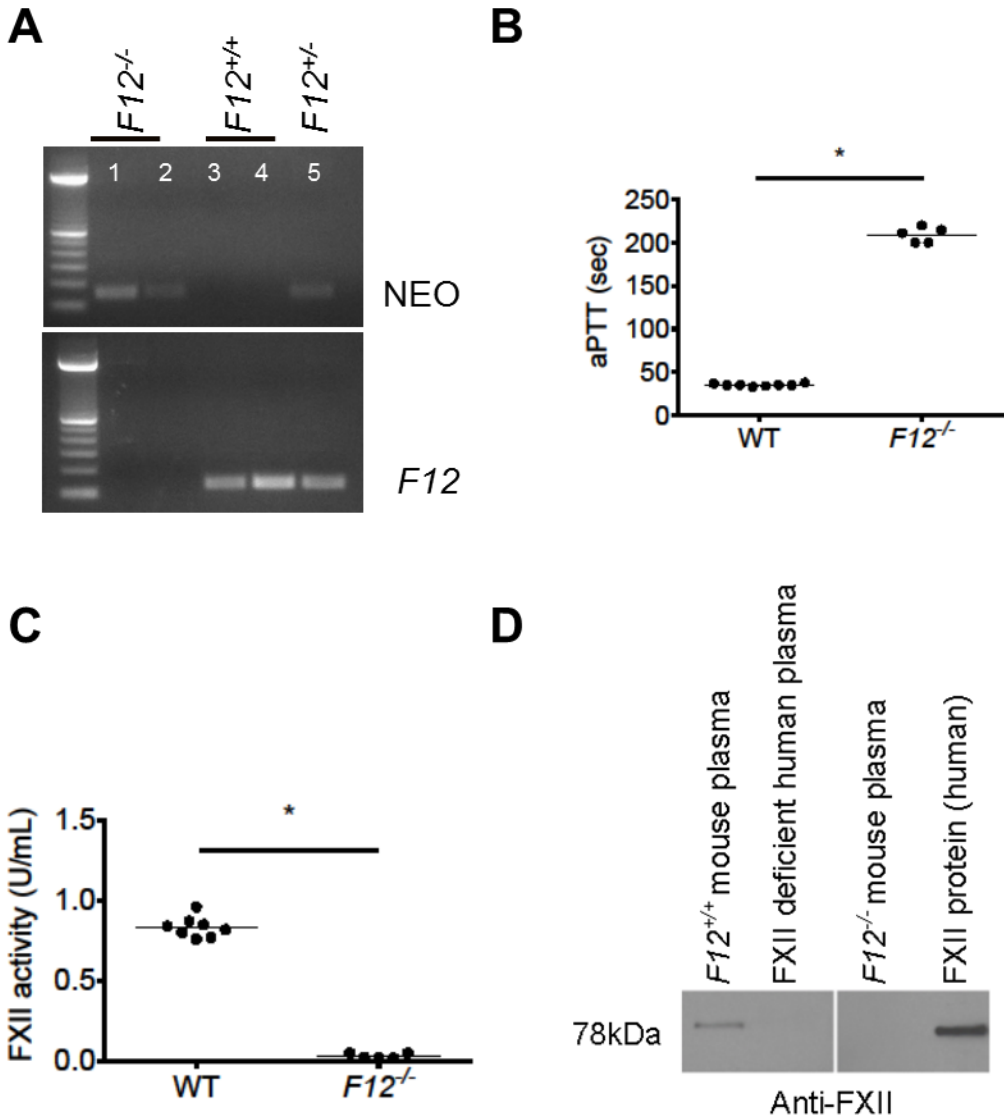

32  
33  
34  
35  
36  
37  
38  
39  
40  
41  
42  
43

### Supplemental Figure 1

**Supplemental Figure 1.** Characterization of  $F12^{-/-}$  mice. (A) Representative separate agarose gels from polymerase chain reaction showing the genotype of wild type ( $F12^{+/+}$ ), heterozygous ( $F12^{+/-}$ ) and FXII deficient ( $F12^{-/-}$ ) mice run simultaneously.  $F12$ : 152 base pairs (bp), single NEO band 128 bp denotes  $F12^{-/-}$  genotype. (B) aPTT was determined in WT and  $F12^{-/-}$  plasma (n=5-8). (C) Plasma FXII coagulant activity from WT and  $F12^{-/-}$  mice (n=5-8). (D) Immunoblot for FXII antigen in murine and human WT and  $F12^{-/-}$  plasmas. This image represents non-contiguous lanes of the same blot. Each image is representative of n=5 experiments.

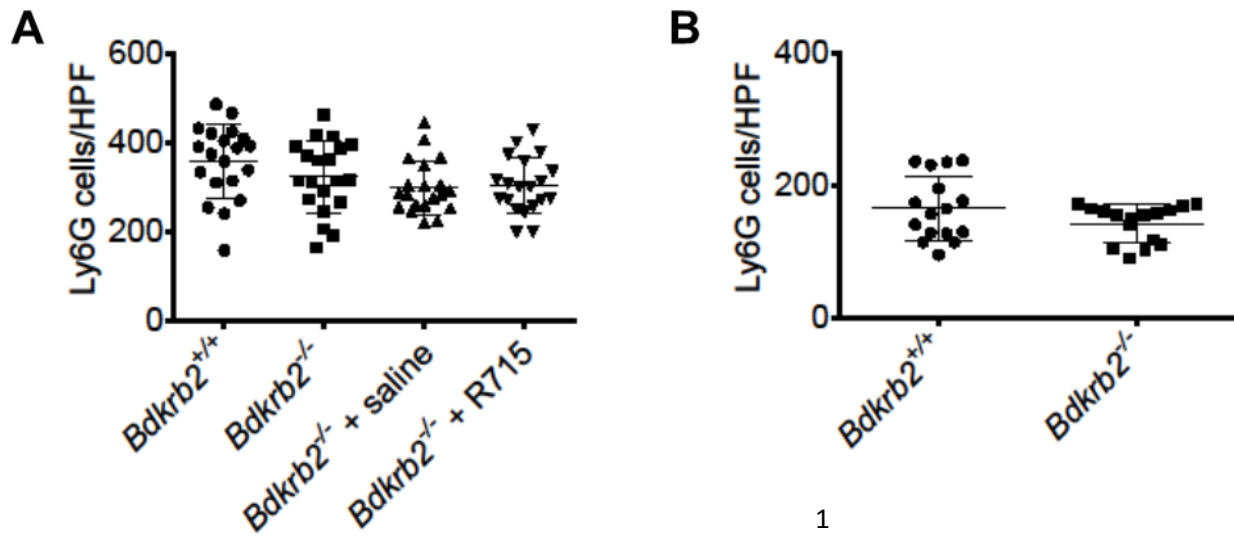

2

## Supplemental Figure 2

3  
4  
5  
6  
7  
8  
9  
10  
11  
12  
13  
14  
15  
16  
17  
18  
19

**Supplemental Figure 2.** *Reduced bradykinin signaling does not influence leukocyte migration into skin wounds.* (A) Number of neutrophils (Ly6G positive cells) per HPF in Day 2 skin wounds of WT, bradykinin 2 receptor knock-out ( $Bdkrb2^{-/-}$ ), and  $Bdkrb2^{-/-}$  mice treated with the bradykinin 1 receptor antagonist R715 are shown. Data represent mean  $\pm$  SD (n = 6-8 mice per group).  $p=0.74$  vs. WT control mice by one-way ANOVA with Bonferroni correction. (B) Number of neutrophils in Day 5 skin wounds of WT and bradykinin 2 receptor knock-out ( $Bdkrb2^{-/-}$ ) mice. Data represent mean  $\pm$  SD (n = 6 mice per group).  $p=0.18$  vs. WT control mice by Student's t-test. Fluorescent images were obtained using a Nikon TE2000-S microscope, 20X magnification. The number of Ly6G positive cells in all groups of animals was compared by morphometric analysis using the NIH ImageJ software. These data indicate that the reduction in plasma bradykinin levels or absence of its receptors does not account for the reduced neutrophil migration seen in wounds of  $F12^{-/-}$  mice.

1  
2  
3  
4  
5  
6  
7  
8  
9  
10  
11  
12  
13  
14  
15  
16  
17  
18  
19  
20  
21  
22  
23  
24  
25  
26  
27  
28  
29

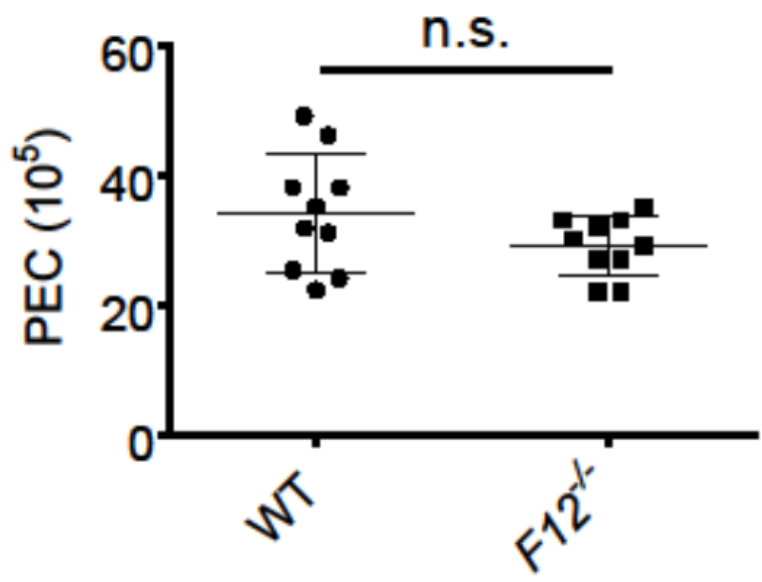

### Supplemental Figure 3

**Supplemental Figure 3.** *Leukocyte migration in thioglycolate-induced peritonitis.* WT and *F12<sup>-/-</sup>* mice were injected intraperitoneally with thioglycolate (TG) solution. At 72 h, mice were subjected to peritoneal lavage and the peritoneal exudate cell (PEC) number was determined. WT: n=10, *F12<sup>-/-</sup>*: n=10 (mean ± SEM. \*p=0.13 vs. WT control mice by Student's t-test). Since the majority of peritoneal exudate cells at this time point are macrophages, these data show that *F12<sup>-/-</sup>* mice have normal macrophage infiltration at sites of sterile inflammation at 72 h.



**A**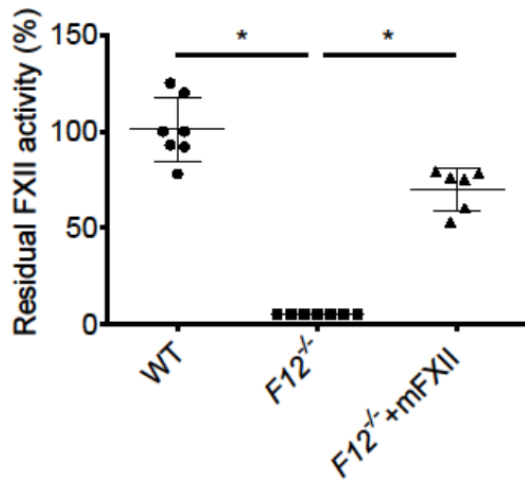**B**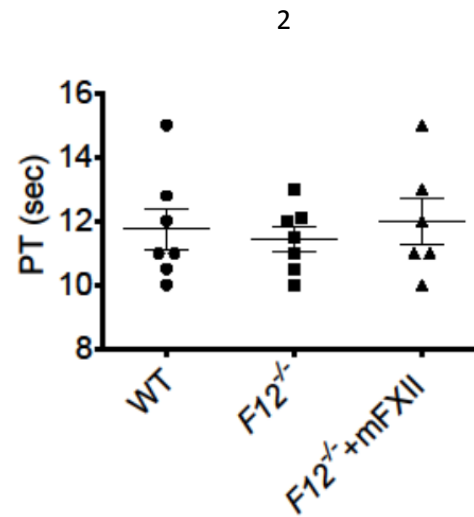

3  
4  
5  
6  
7  
8  
9  
10  
11  
12  
13  
14

### Supplemental Figure 4

**Supplemental Figure 4.** Plasma FXII activity and Prothrombin Time in *F12<sup>-/-</sup>* mice reconstituted with recombinant mouse FXII. (A) Plasma FXII coagulant activity from WT (n=7), *F12<sup>-/-</sup>* (n=7), and *F12<sup>-/-</sup>* mice reconstituted with recombinant mouse FXII (mFXII) to plasma FXII level of 650 nM, (n=6). Plasma was collected 4 h after reconstitution with mFXII and thioglycolate-induced peritonitis. Data represent mean ± SEM. \*p<0.001 *F12<sup>-/-</sup>* vs. WT; p=0.0004 *F12<sup>-/-</sup>*+mFXII vs. WT, one-way ANOVA with Bonferroni correction. (B) Prothrombin Time was determined in plasma (n=6-7) at the time of peritoneal lavage, 4 h after thioglycolate instillation and mFXII reconstitution. Data represent mean ± SEM. p>0.99 vs. WT control mice by one-way ANOVA with Bonferroni correction.

3  
4  
5  
6  
7  
8  
9  
10  
11  
12  
13  
14  
15  
16  
17  
18  
19  
20  
21  
22  
23  
24

**A**

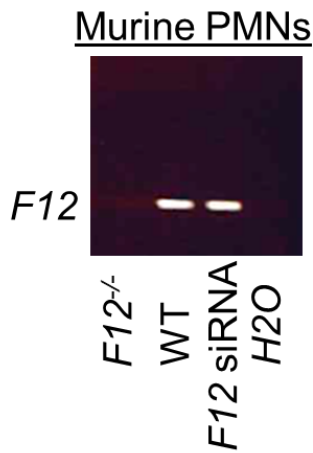

**B**

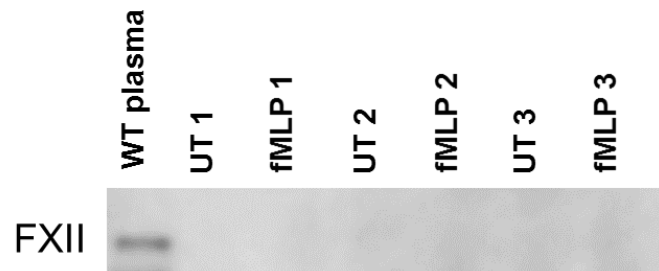

### Supplemental Figure 5

**Supplemental Figure 5.** *F12* expression profile in murine neutrophils and macrophages. **(A)** Murine total mRNA was isolated from bone marrow-derived neutrophils (PMNs) of WT, *F12*<sup>-/-</sup>, and *F12* siRNA-treated WT mice. First strand cDNA was synthesized with Superscript III reverse transcriptase. The PCR product is shown on an exon 1-6 probe. Images are representative of 3 experiments. **(B)** Western blot under reduced conditions for FXII was performed using polyclonal anti-FXII antibody. UT 1-3: untreated peripheral mononuclear cells. fMLP 1-3: peripheral mononuclear cells stimulated with 10  $\mu$ M fMLP. Representative blot of n=3 experiments.

1  
2  
3  
4  
5  
6  
7  
8  
9  
10  
11  
12  
13  
14  
15  
16  
17  
18  
19  
20  
21  
22  
23  
24  
25  
26  
27  
28  
29  
30  
31

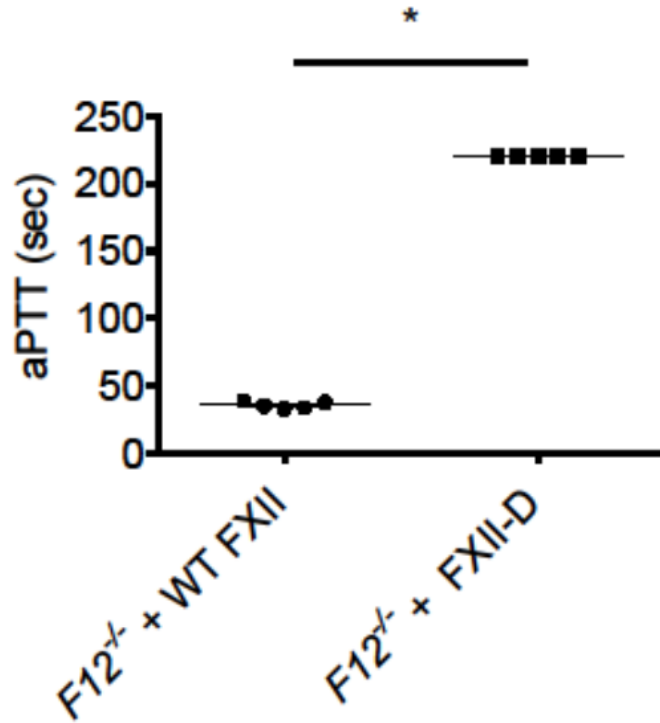

### Supplemental Figure 6

**Supplemental Figure 6.** *Surface-initiated coagulation in plasma.* The aPTT (sec) time of FXII deficient (*F12<sup>-/-</sup>*) plasma reconstituted with recombinant WT FXII (n=5) or FXII double mutant (FXII-D) species that contain combined R353P and S544A mutations (n=5). Each sample was run in triplicate and data represent mean ± SEM. \*p<0.0001 by Student's t-test.

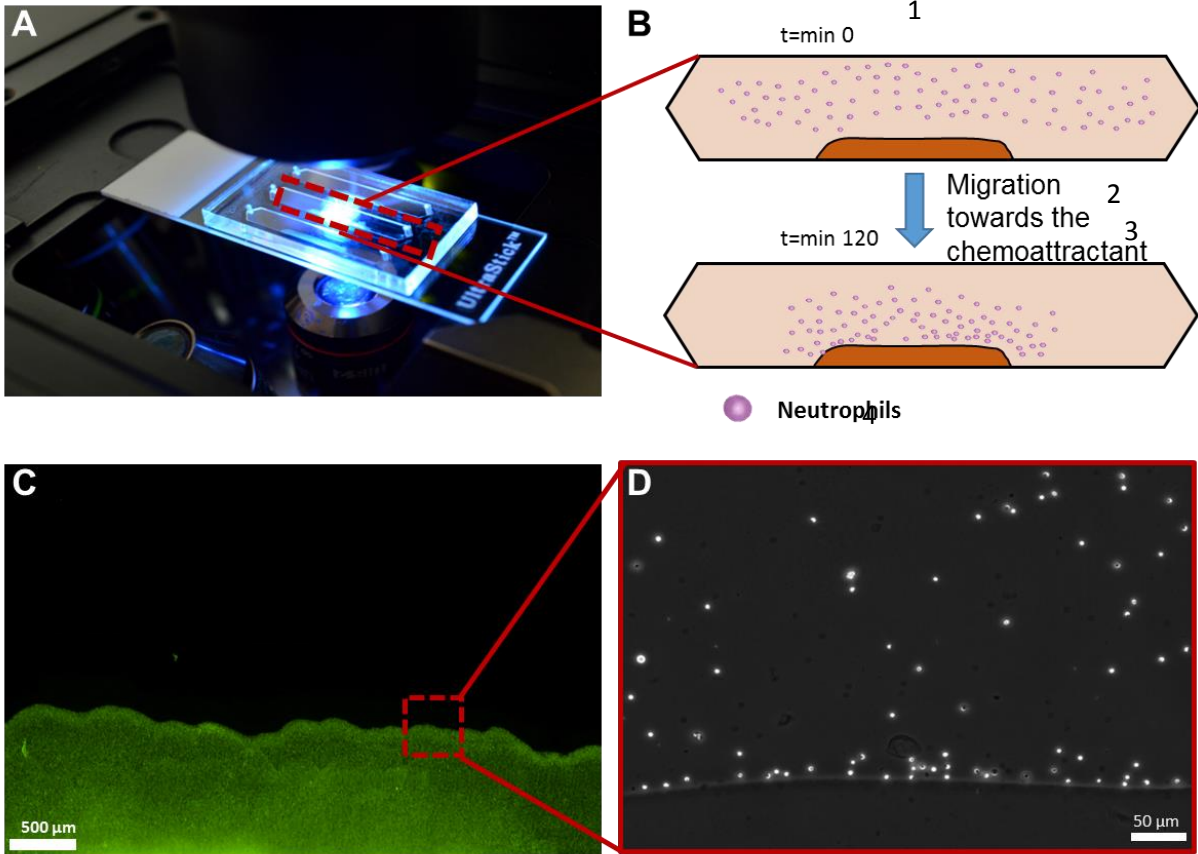

Supplemental Figure 7

5  
6  
7  
8  
9  
10  
11  
12  
13  
14  
15  
16  
17  
18  
19  
20  
21  
22  
23  
24  
25  
26

**Supplemental Figure 7.** *Microfluidic channel set-up for live cell neutrophil chemotaxis.* (A) After a microfluidic device was designed and prepared, it was placed on a fully motorized inverted microscope (Olympus, model: IX83). A total number of  $1 \times 10^6$  neutrophils obtained from WT, *F12<sup>-/-</sup>* or *Plaur<sup>-/-</sup>* mice for each experimental group were loaded into the channels and allowed to settle and adhere to the matrigel surface for 10 min. For each mouse genotype, 3 experimental groups were performed using media, fMLP, or FXII/Zn<sup>2+</sup> as chemoattractants. Upon initiation of the assay, the bright field images in the vicinity of matrigel/chemoattractant interphase were recorded at 5 min intervals for each channel up to 120 min. The acquired images were later processed using ImageJ (NIH) software to determine the number of neutrophils which had migrated at the chemoattractant interphase within 120 min. (B) Schematic illustration of a starting suspension of neutrophils that migrate towards the chemoattractant over 120 min. Neutrophils in this panel are drawn to scale. (C) To ensure that a clear interphase was formed between the neutral and chemoattractant-infused matrigel layers, 2- $\mu\text{m}$  fluorescent beads were added into the matrigel along with the chemoattractants. A 10X scan of the channel reveals a clear and homogeneous distribution of chemoattractant along the side of the channel, which also demonstrates the existence of a sharp interphase that constituted the target for neutrophils to migrate towards. (D) Neutrophils were loaded into the channels at a concentration level of  $1 \times 10^6$  cells/mL, which was found to be the optimal concentration after several trials.

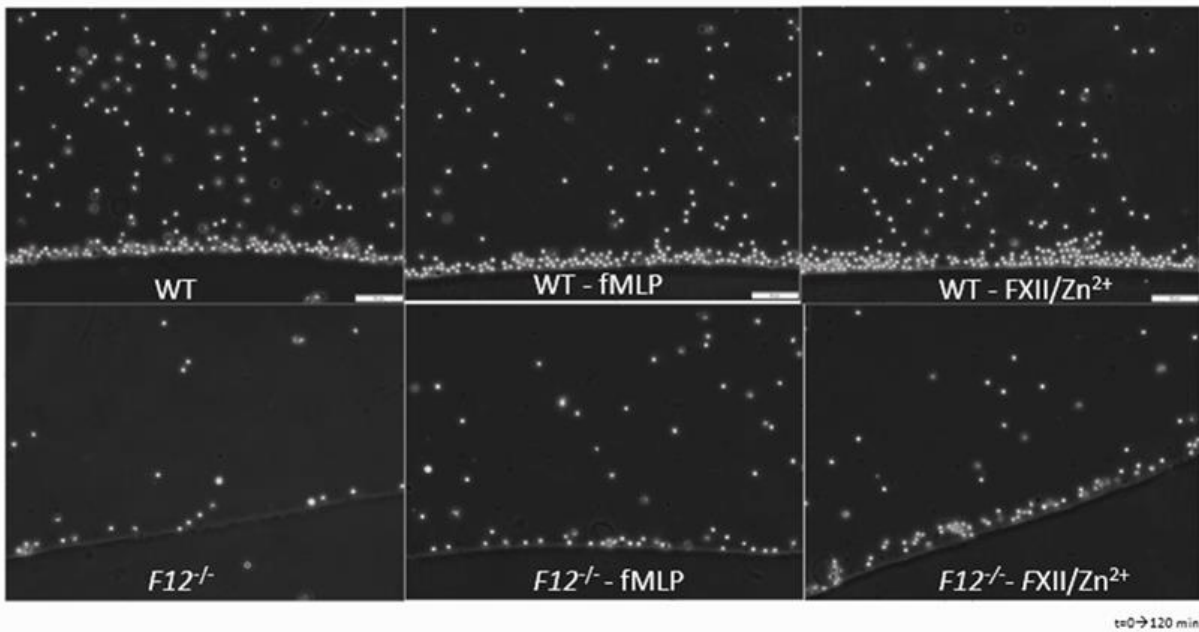

### Supplemental Figure 8

- 1
- 2
- 3
- 4
- 5

**Supplemental Figure 8.** *Neutrophil chemotaxis in a microfluidic channel assay.* Pictures are representative images acquired at t=2 h.

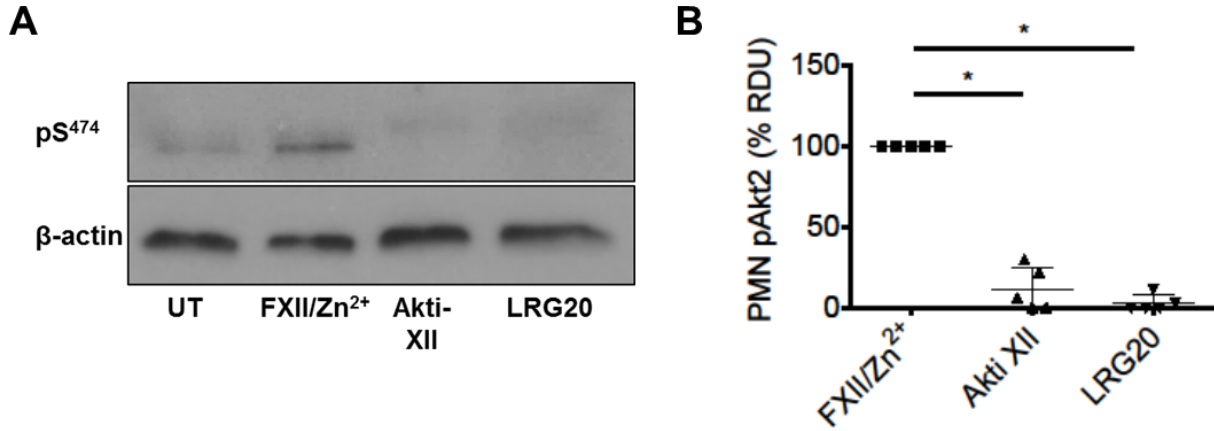

Supplemental Figure 9

1  
2 **Supplemental Figure 9.** Targeting the FXII-uPAR interaction inhibits pAkt2S<sup>474</sup>. (A) Washed WT  
3 neutrophils were treated with 62 nM FXII and 10 μM Zn<sup>2+</sup> for 5 min. Lanes labeled as Akti-XII  
4 and LRG20 were pretreated with Akti-XII (5 μM) and LRG20 (300 μM) for 30 min, followed by  
5 FXII/Zn<sup>2+</sup> treatment. Lysates were immunoblotted with antibodies against pAkt2S<sup>474</sup>. (B) Percent  
6 pAkt2S<sup>474</sup> in neutrophils. Untreated (UT) cell band density was considered 0%; band density of  
7 FXII/Zn<sup>2+</sup>-treated cells minus UT cell band density was set at 100%. Data represent mean ± SEM  
8 of 5 experiments (\*p< 0.0001 by one-way ANOVA with Bonferroni correction).  
9

1  
2  
3  
4  
5  
6  
7  
8  
9  
10  
11  
12  
13  
14  
15  
16  
17  
18  
19  
20  
21  
22  
23  
24  
25  
26

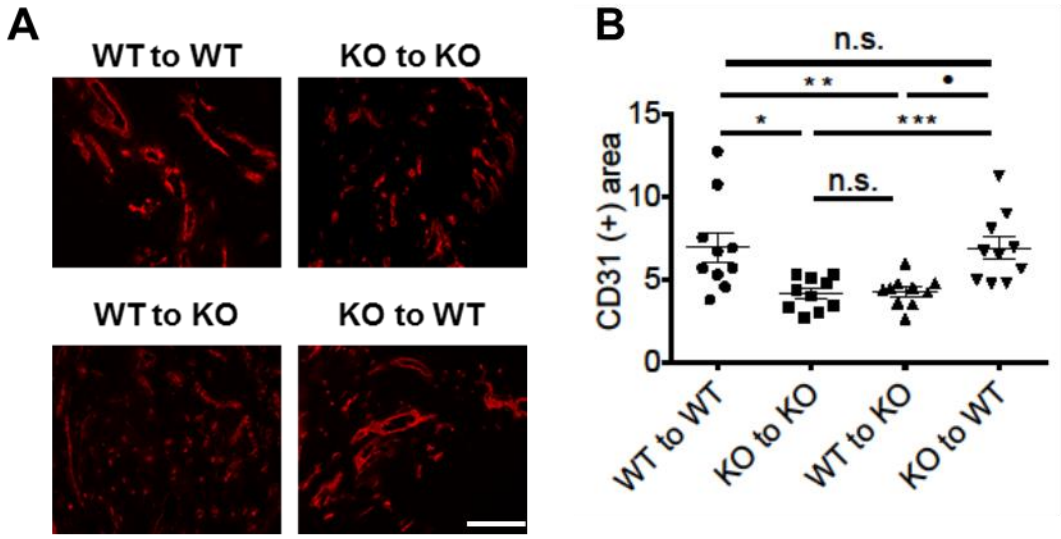

### Supplemental Figure 10

**Supplemental Figure 10.** *The influence of bone marrow transplantation on angiogenesis.* (A) CD31 staining on frozen sections from Day 5 skin wounds in WT and KO BM chimeras (n=10 mice in each group). Immunofluorescent images were obtained using a Nikon TE2000-S microscope at 20X magnification. Scale, 10  $\mu$ m. (B) The area of CD31 staining in all groups of animals was compared by morphometric analysis using the NIH ImageJ software. \*p=0.01, \*\*p=0.015, \*\*\*p=0.013, •p=0.019 by one-way ANOVA with Bonferroni correction.

Supplemental Table 1

|                          | WBC<br>(10 <sup>3</sup> /μL) | Neutrophils<br>(10 <sup>3</sup> /μL) | Lymphocytes<br>(10 <sup>3</sup> /μL) | Monocytes<br>(10 <sup>3</sup> /μL) | Hgb<br>(g/dL) | Platelets<br>(10 <sup>3</sup> /μL) | Mean<br>PT<br>(sec) |
|--------------------------|------------------------------|--------------------------------------|--------------------------------------|------------------------------------|---------------|------------------------------------|---------------------|
| <b>WT</b>                | 5.0 ± 1.3                    | 1.06 ± 0.5                           | 3.76 ± 1.0                           | 0.17 ± 0.0                         | 12.1 ± 1.1    | 722 ± 166                          | 12.1                |
| <b>F12<sup>-/-</sup></b> | 4.18 ± 1.4                   | 1.27 ± 0.3                           | 2.6 ± 1.0                            | 0.31 ± 0.1                         | 12.2 ± 1.3    | 692 ± 137                          | 11.7                |

1  
2 **Supplemental Table 1.** *Hematologic parameters in WT and F12<sup>-/-</sup> mice.* Hematologic parameters  
3 in WT and *F12<sup>-/-</sup>* mice. Blood cells from WT and *F12<sup>-/-</sup>* mice were counted using an automated  
4 HEMAVET 950 analyzer (Drew Scientific). Data represent the mean ± SD (n = 6 mice per group).  
5 The prothrombin time was performed as indicated in the Methods.  
6



Supplemental Table 2

| $k_{on}$                             | $k_{off}$                | $K_D$           |
|--------------------------------------|--------------------------|-----------------|
| $10^5 \text{ M}^{-1} \text{ s}^{-1}$ | $10^{-3} \text{ s}^{-1}$ | nM              |
| $2.03 \pm 0.85$                      | $5.02 \pm 2.82$          | $37.1 \pm 29.4$ |

1

2

3

4

5

**Supplemental Table 2.** *Binding constants of FXII to immobilized uPAR.* Data reflect binding kinetics in the presence of 10  $\mu\text{M}$  zinc. Mean  $\pm$  SD of binding constants from n=3 sensorgrams using BiaCore Langmuir binding model.

Supplemental Table 3

|                            | WT-WT          | KO-KO           | WT-KO          | KO-WT          |
|----------------------------|----------------|-----------------|----------------|----------------|
| WBC ( $10^3/\mu\text{L}$ ) | $4.04 \pm 1.3$ | $3.42 \pm 1.0$  | $3.96 \pm 1.0$ | $4.78 \pm 1.4$ |
| ANC ( $10^3/\mu\text{L}$ ) | $1.94 \pm 0.4$ | $1.54 \pm 0.3$  | $1.47 \pm 0.3$ | $1.73 \pm 0.2$ |
| Hgb (g/dL)                 | $13.3 \pm 1.4$ | $12.4 \pm 1.03$ | $13.1 \pm 1.9$ | $12.9 \pm 1.2$ |
| PLT ( $10^3/\mu\text{L}$ ) | $753 \pm 111$  | $742 \pm 130$   | $692 \pm 122$  | $707 \pm 117$  |

1  
2  
3  
4  
5

**Supplemental Table 3.** CBC parameters 6 weeks after adoptive bone marrow transfers. Data represent the mean  $\pm$  SD (n = 4 mice per group).

Full Unedited Gel for Figure 4B: FXII

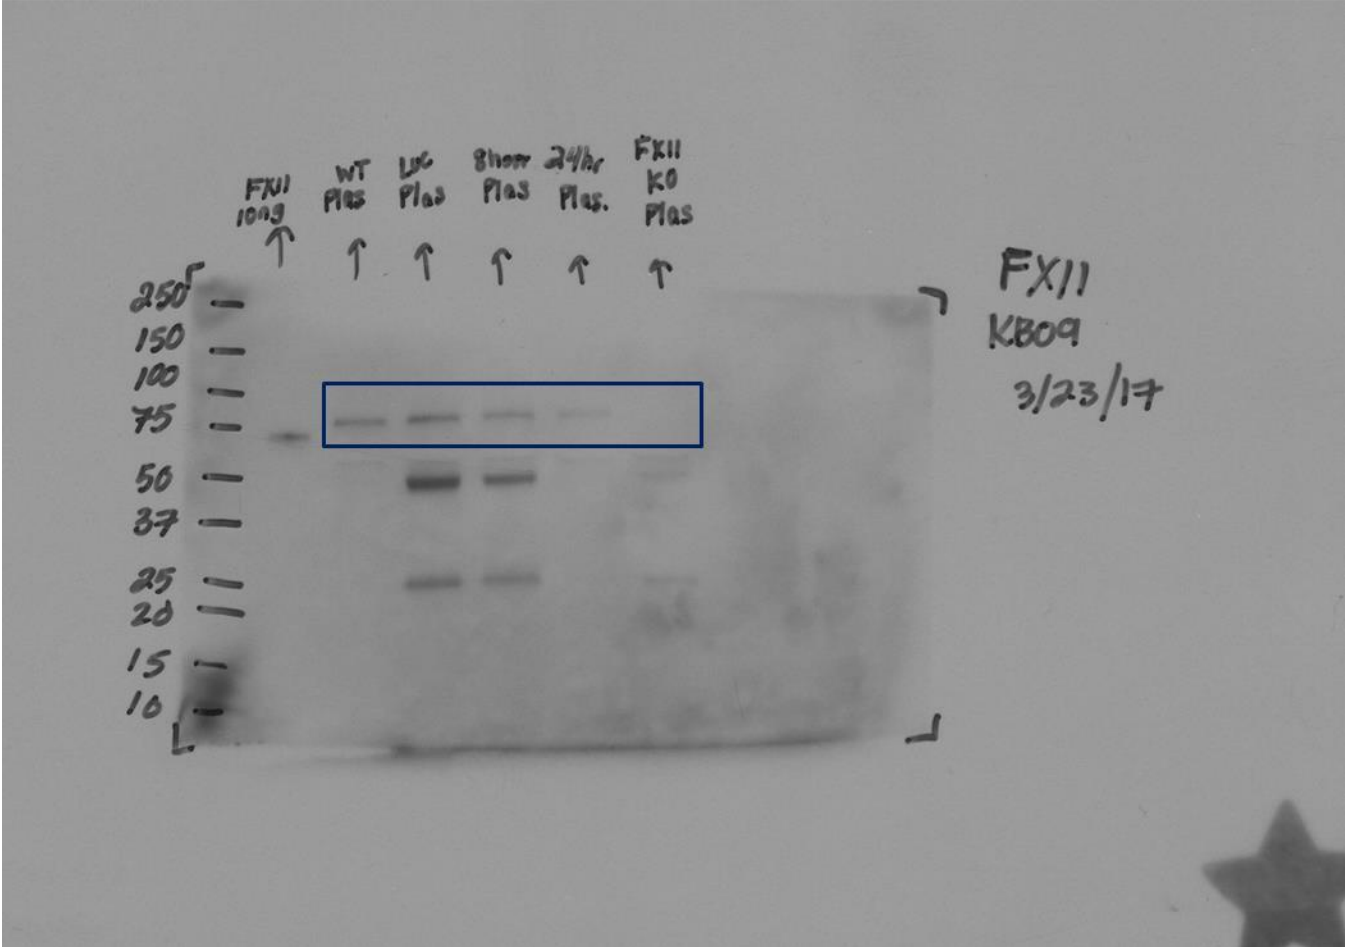

**Full Unedited Gel for Figure 5A: *F12* PCR**

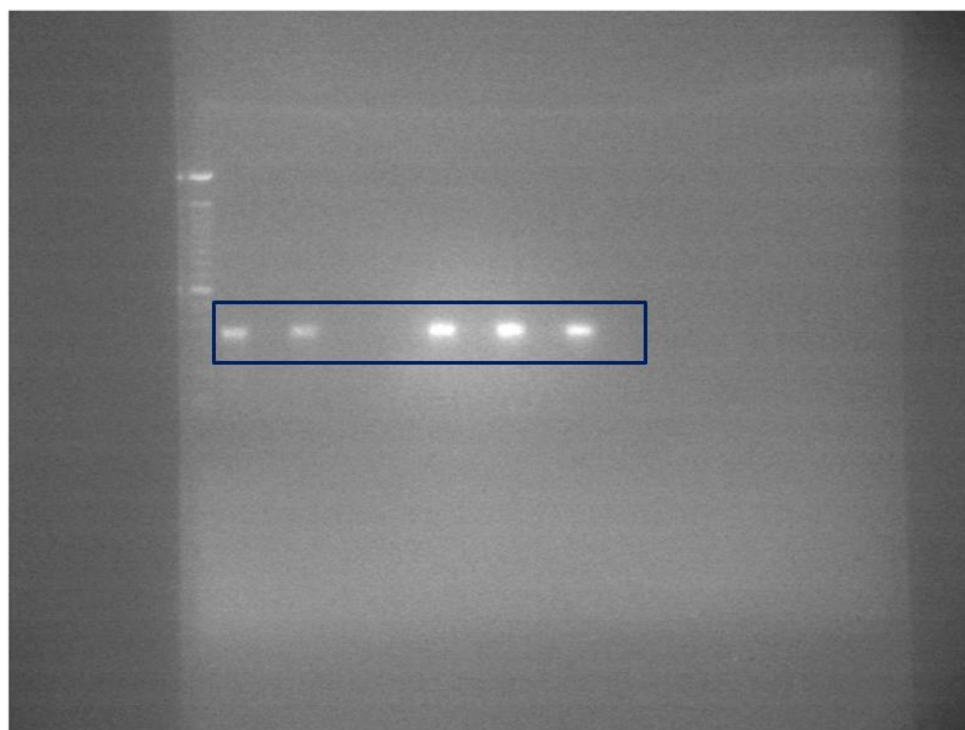

**Full Unedited Gel for Figure 6A: FXII  
switched to Odyssey Infrared Imaging System for blot  
development**

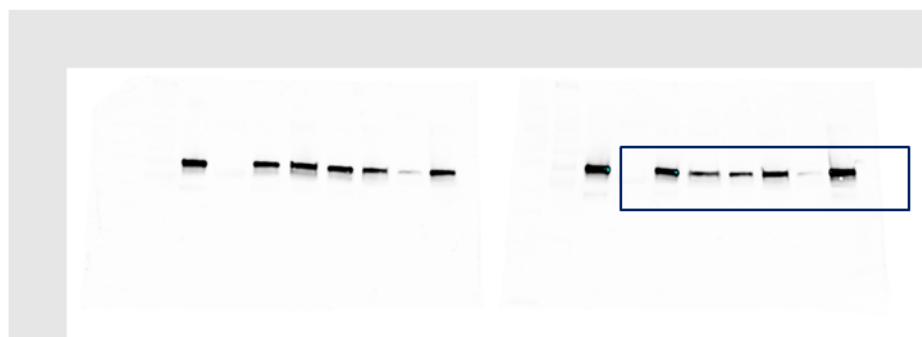

Full Unedited Gel for Figure 6C:  
pAkt Ser<sup>473</sup> (TOP)

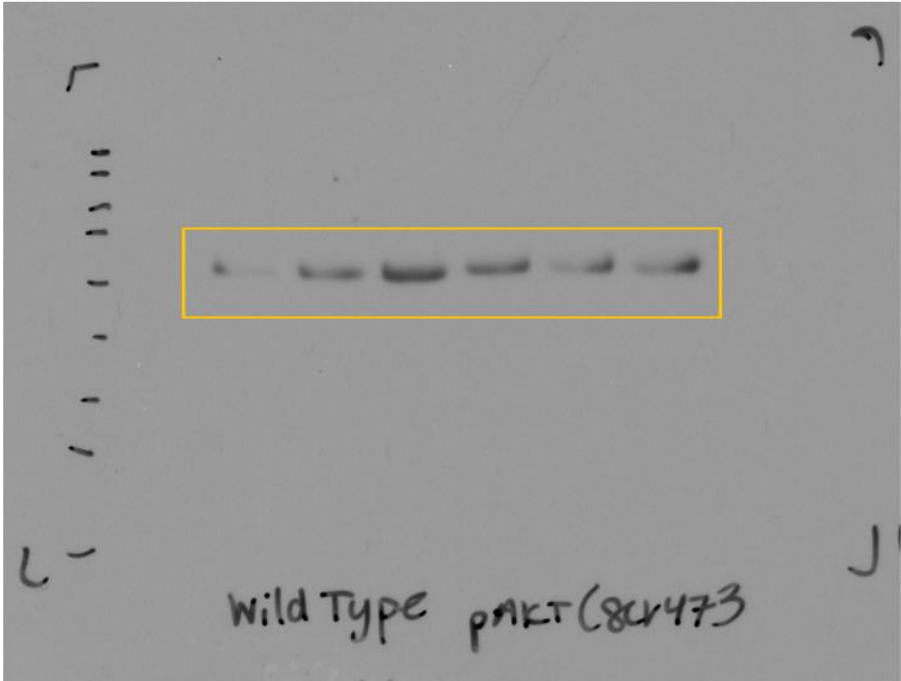

**Full Unedited Gel for Figure 6C:  
total Akt (BOTTOM)**

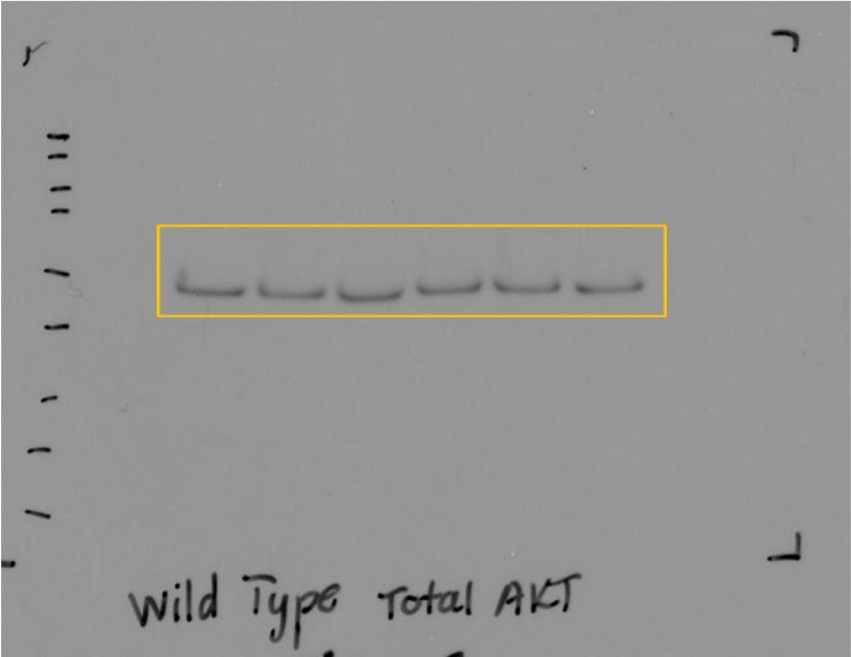

Full Unedited Gel for Figure 6D:  
pAkt Ser<sup>473</sup> (TOP)

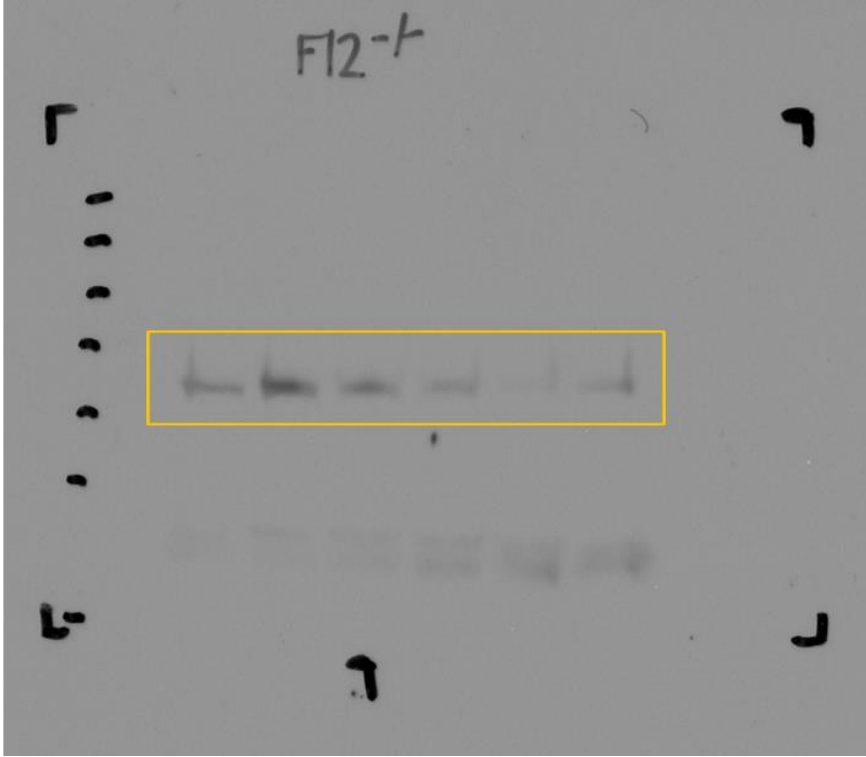



Full Unedited Gel for Figure 6D:  
total Akt (BOTTOM)

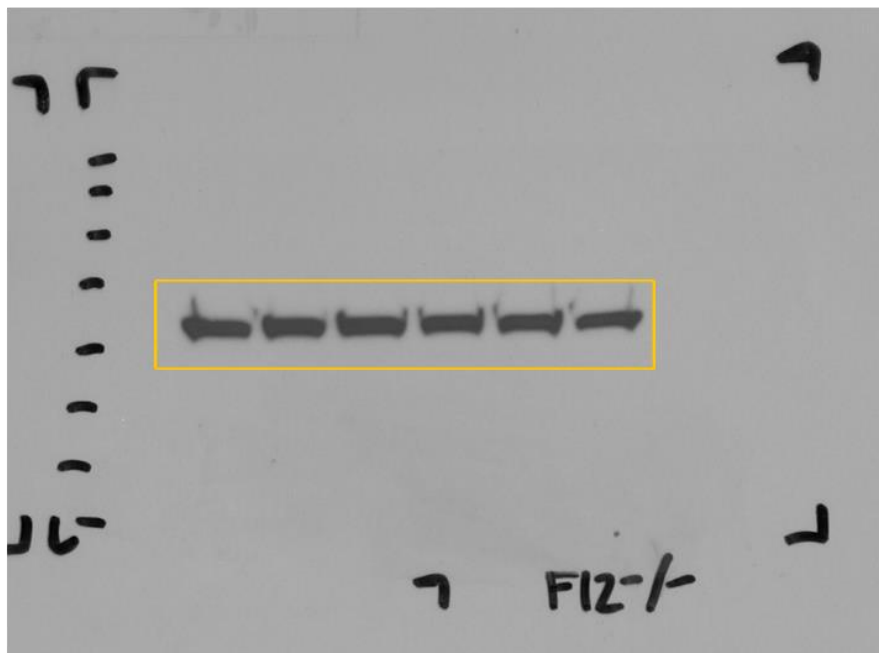

**Full Unedited Gel for Figure 6E:  
pAkt Ser<sup>473</sup> (TOP)**

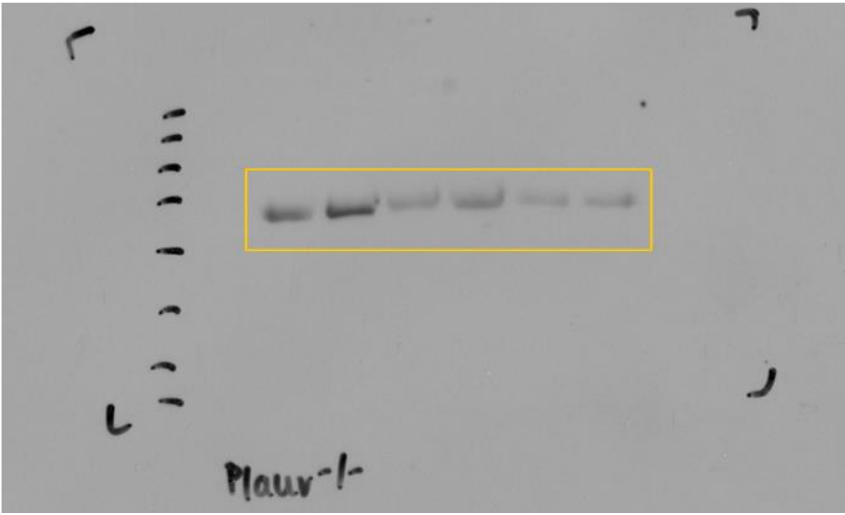

**Full Unedited Gel for Figure 6E:  
total Akt (BOTTOM)**

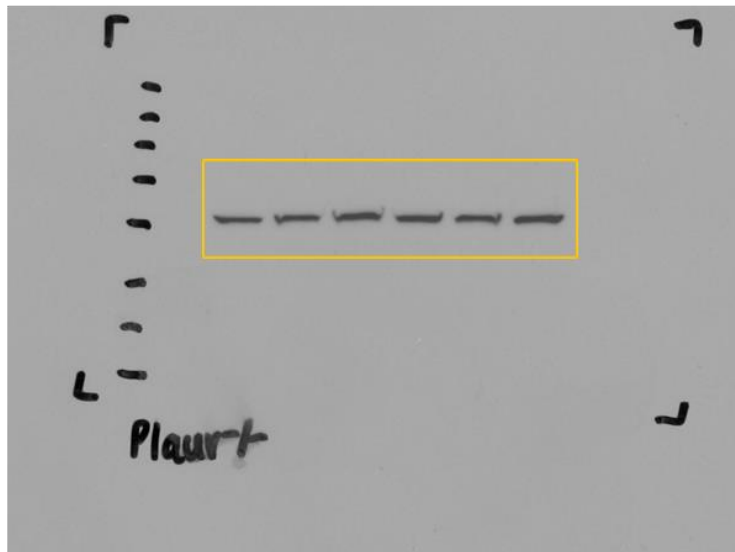

Full Unedited Gel for Supplemental Figure 6F:  
pAktS<sup>474</sup> (TOP)

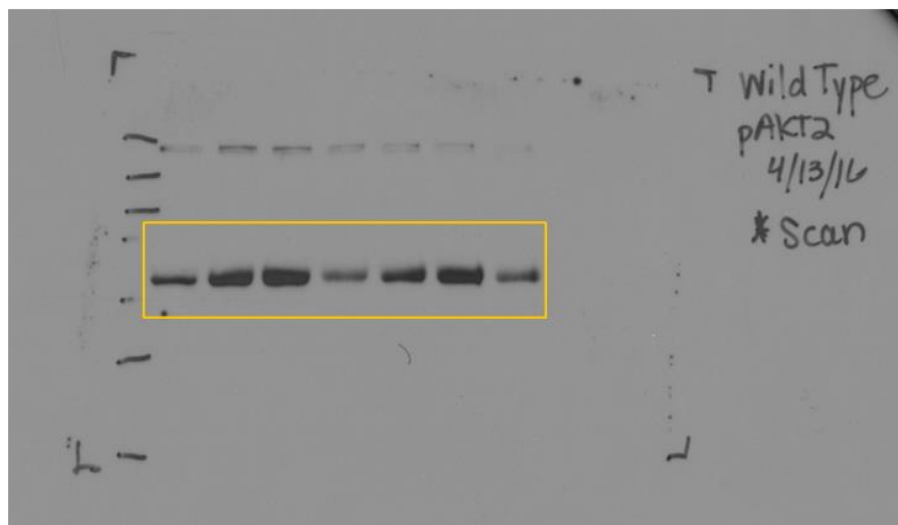

**Full Unedited Gel for Supplemental Figure 6F:  
total Akt (BOTTOM)**

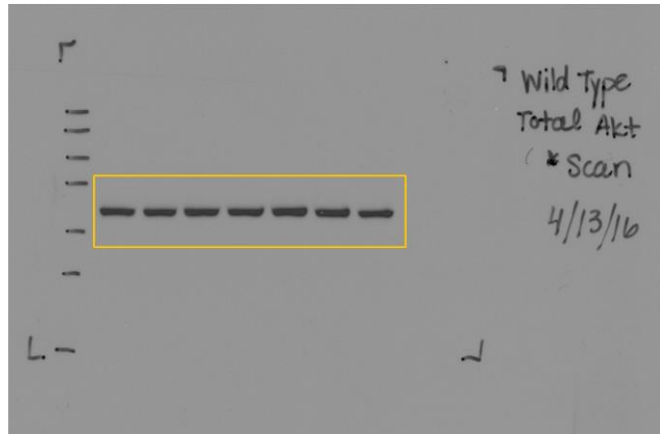

Full Unedited Gel for Supplemental Figure 6G:  
pAktS<sup>474</sup> (TOP)

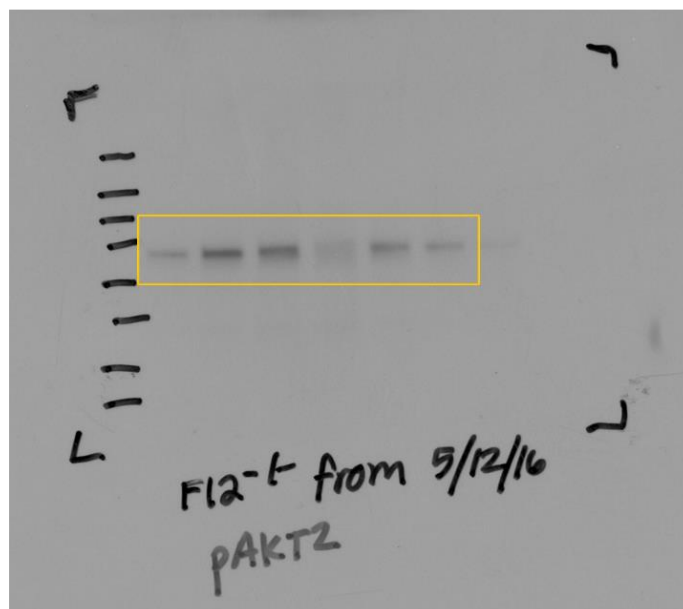

**Full Unedited Gel for Supplemental Figure 6G:  
total Akt (BOTTOM)**

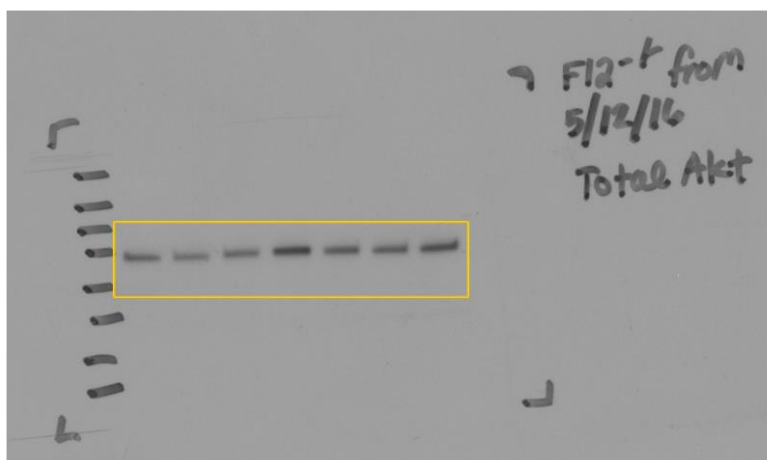

Full Unedited Gel for Supplemental Figure 6H:  
pAktS<sup>474</sup> (TOP)

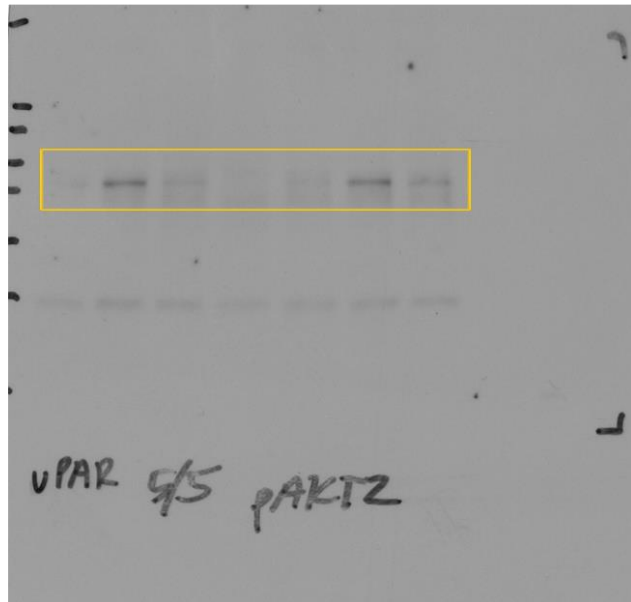



Full Unedited Gel for Supplemental Figure 6H:  
total Akt (BOTTOM)

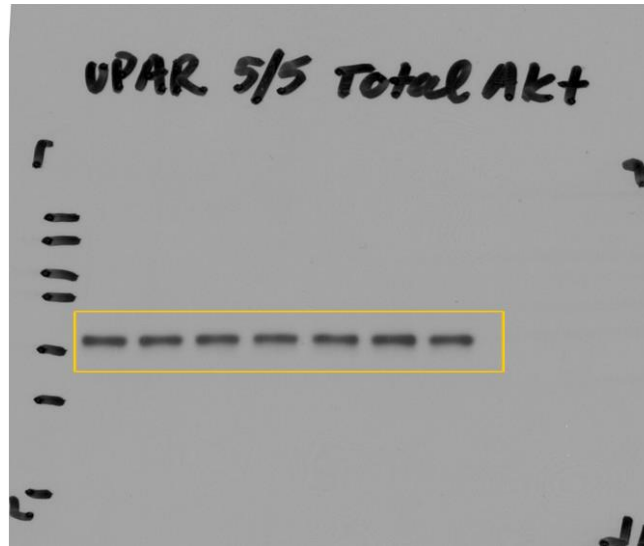

# Full Unedited Gel for Figure 7A

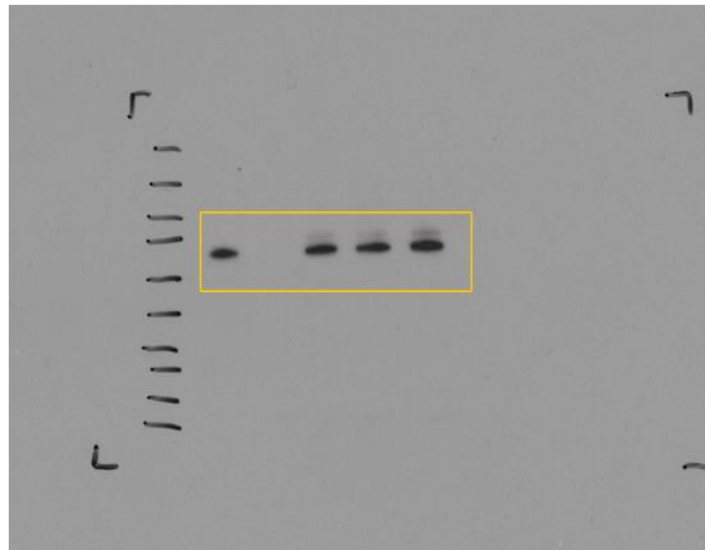

**Full Unedited Gel for Figure 7D:  
FXII immunoblotting of FXII variants**

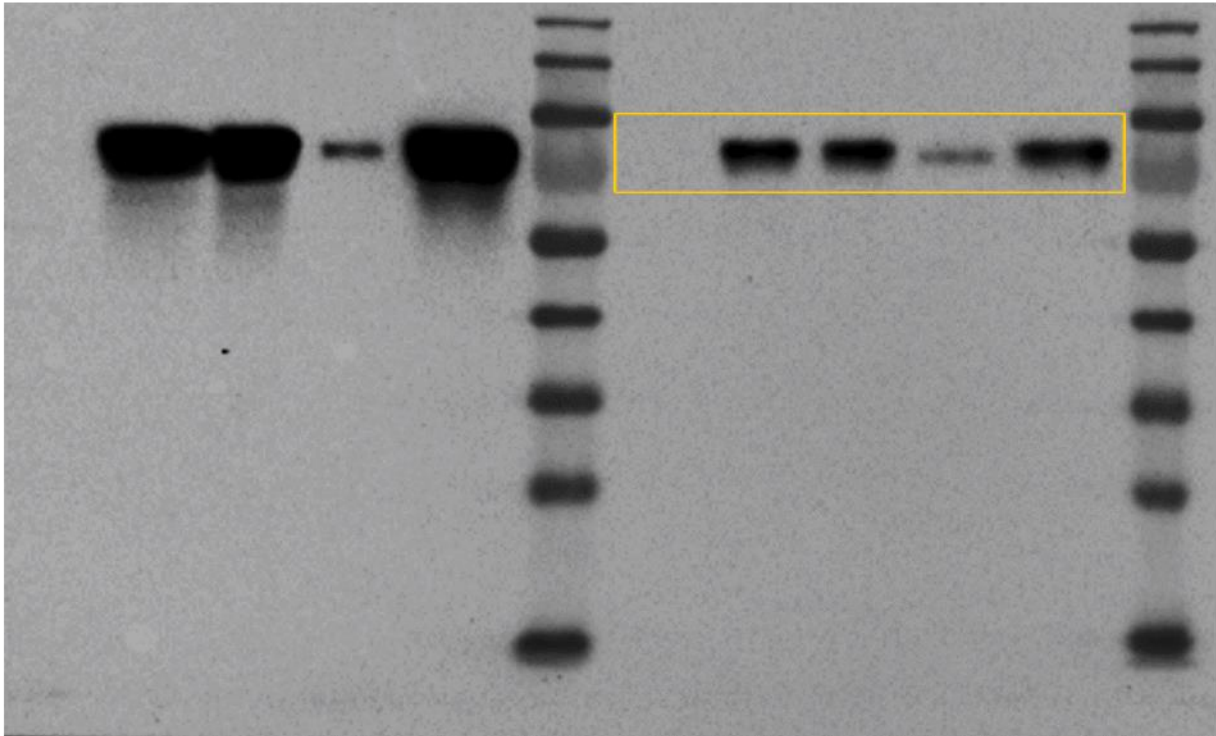

Full Unedited Gel for Figure 7E:  
pAktS<sup>474</sup> (TOP)

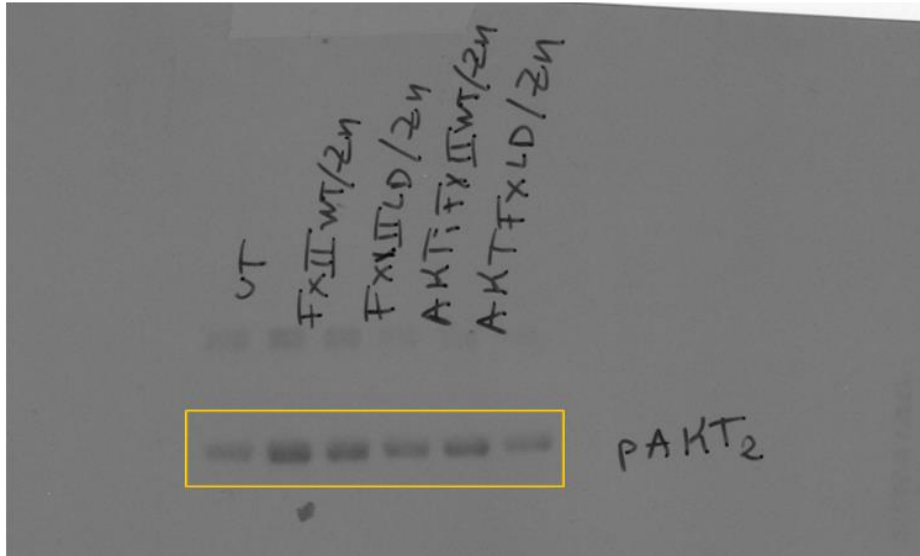

Full Unedited Gel for Figure 7E:  
 $\beta$ -actin (BOTTOM)

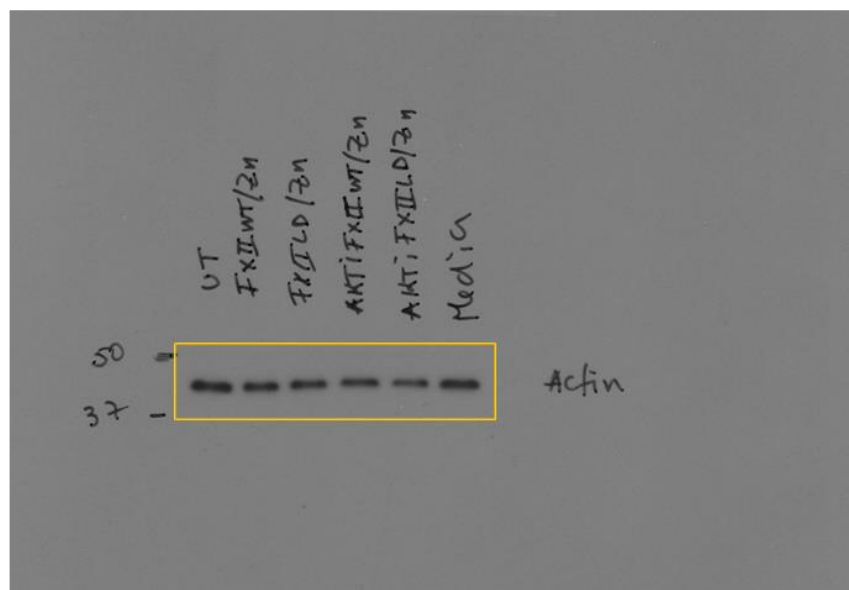

Full Unedited Gel for Figure 9E: H3-C (TOP)

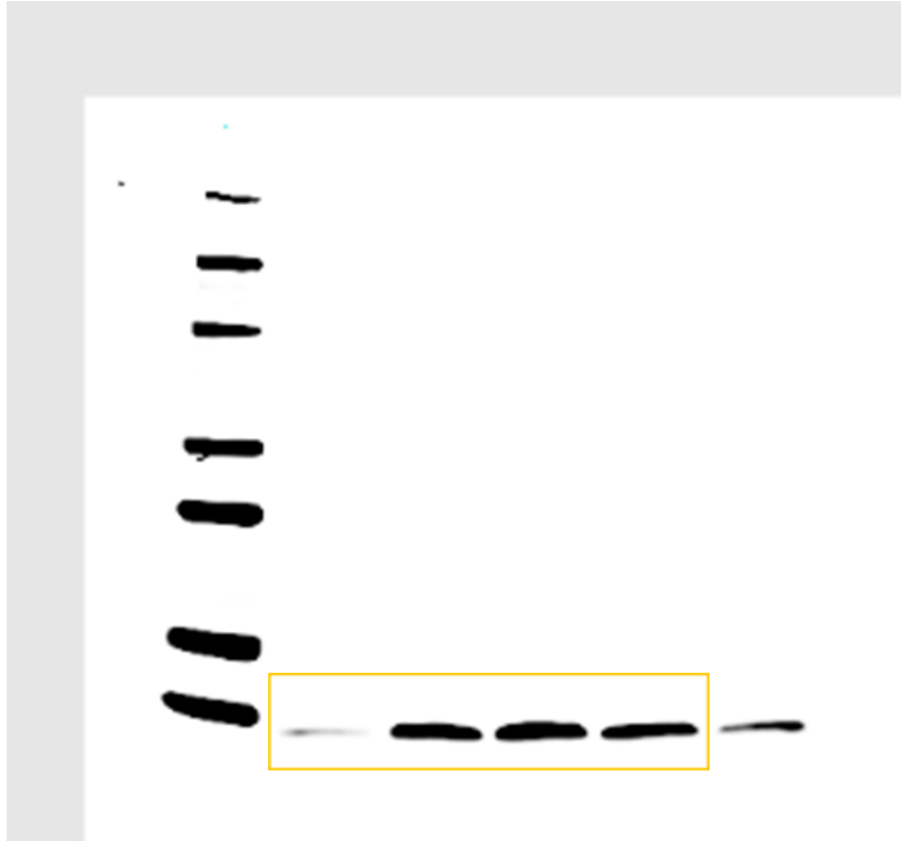

Full Unedited Gel for Figure 9E:  $\beta$ -actin (BOTTOM)

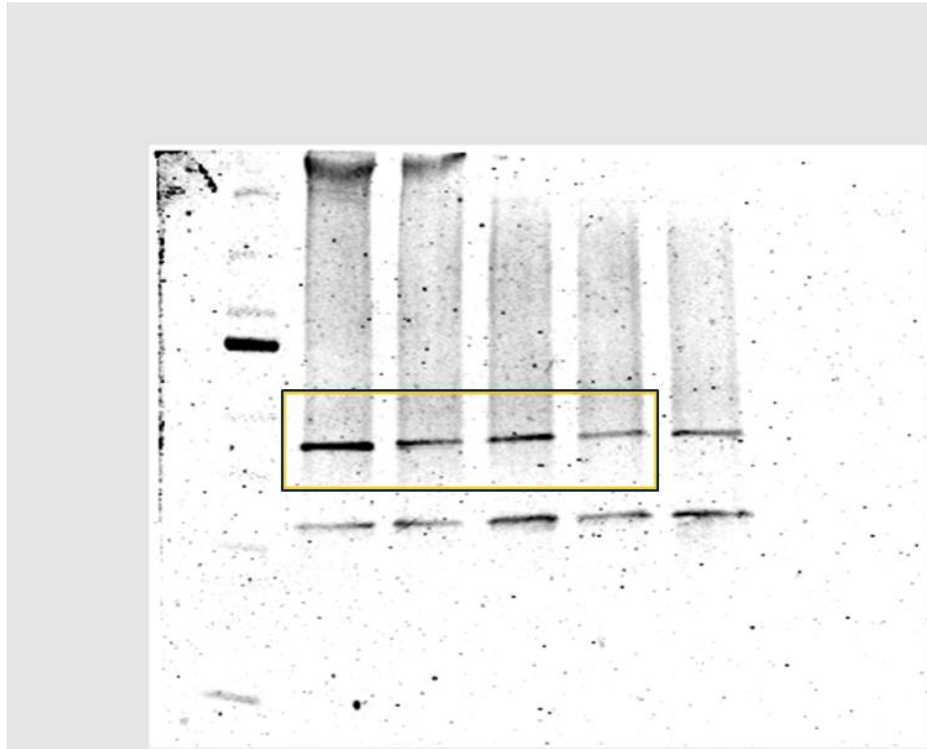

**Full Unedited Gel for Figure 9G: H3-C (TOP)**

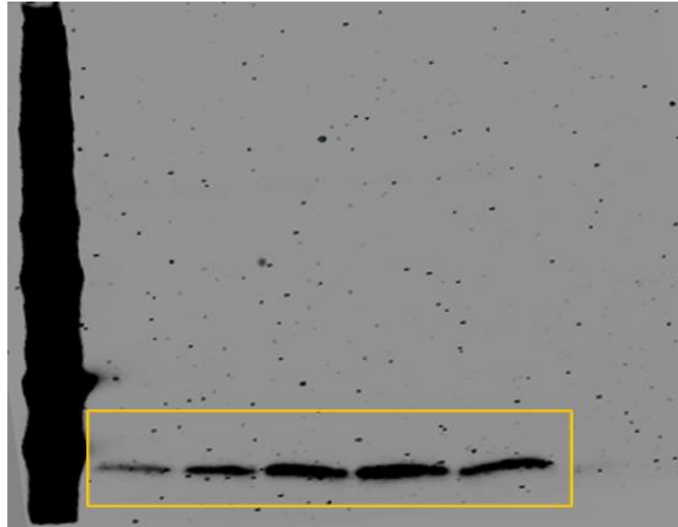



**Full Unedited Gel for Figure 9G:  $\beta$ -actin (BOTTOM)**

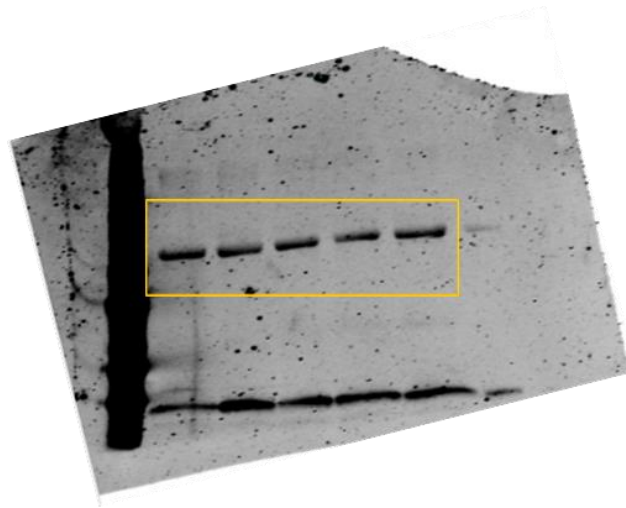

## Full Unedited Gel for Supplemental Figure 1A

*F12*  
(BOTTOM band)

NEO  
(TOP band in manuscript)

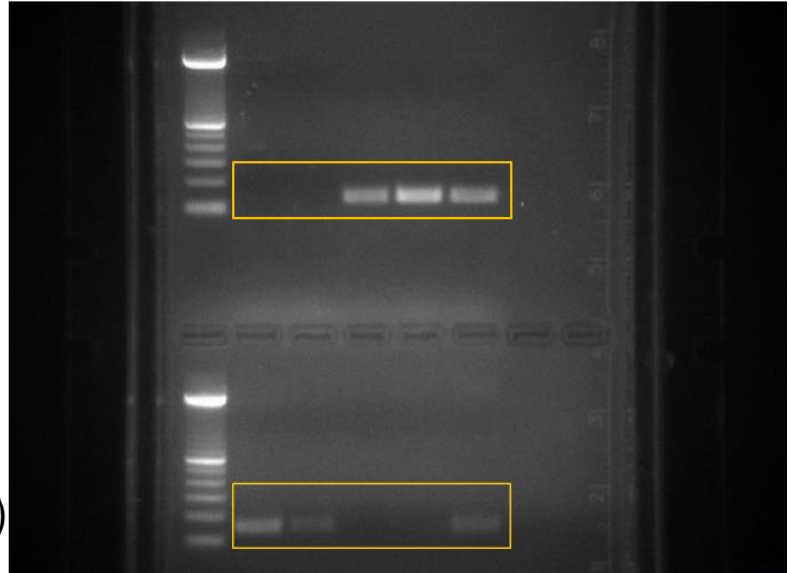

# Full Unedited Gel for Supplemental Figure 1D

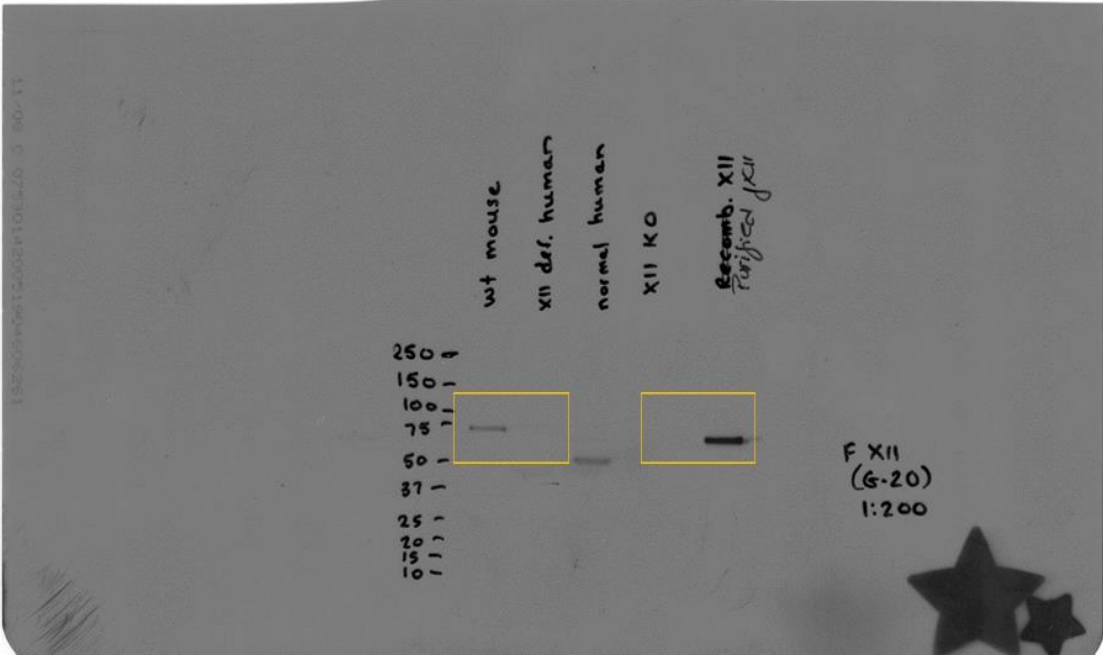

**Full Unedited Gel for Supplemental Figure 5A:  
*F12* PCR**

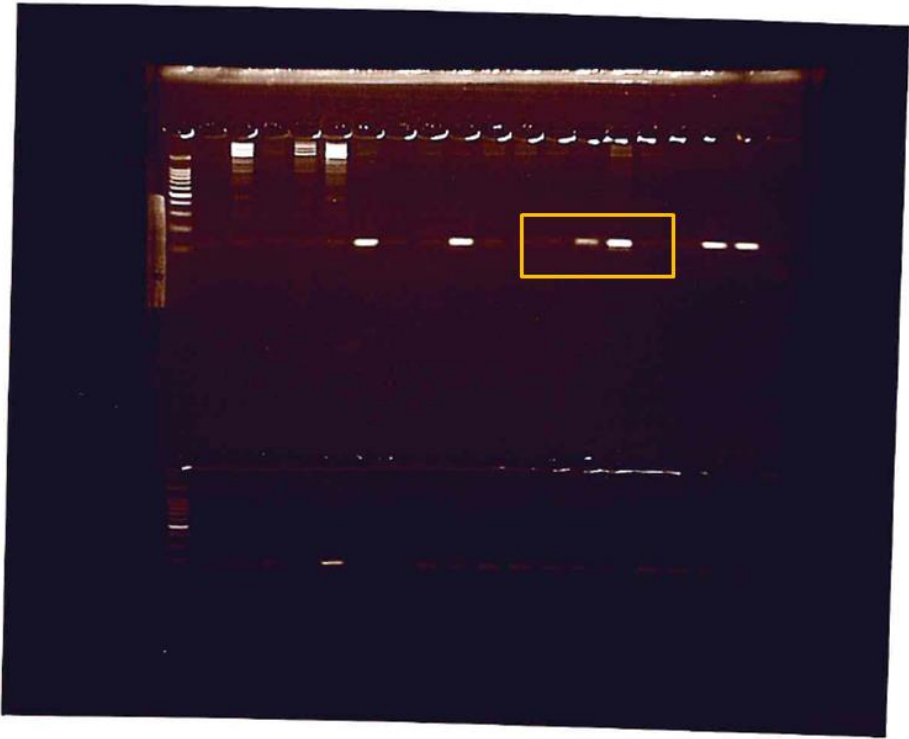

# Full Unedited Gel for Supplemental Figure 5B: FXII

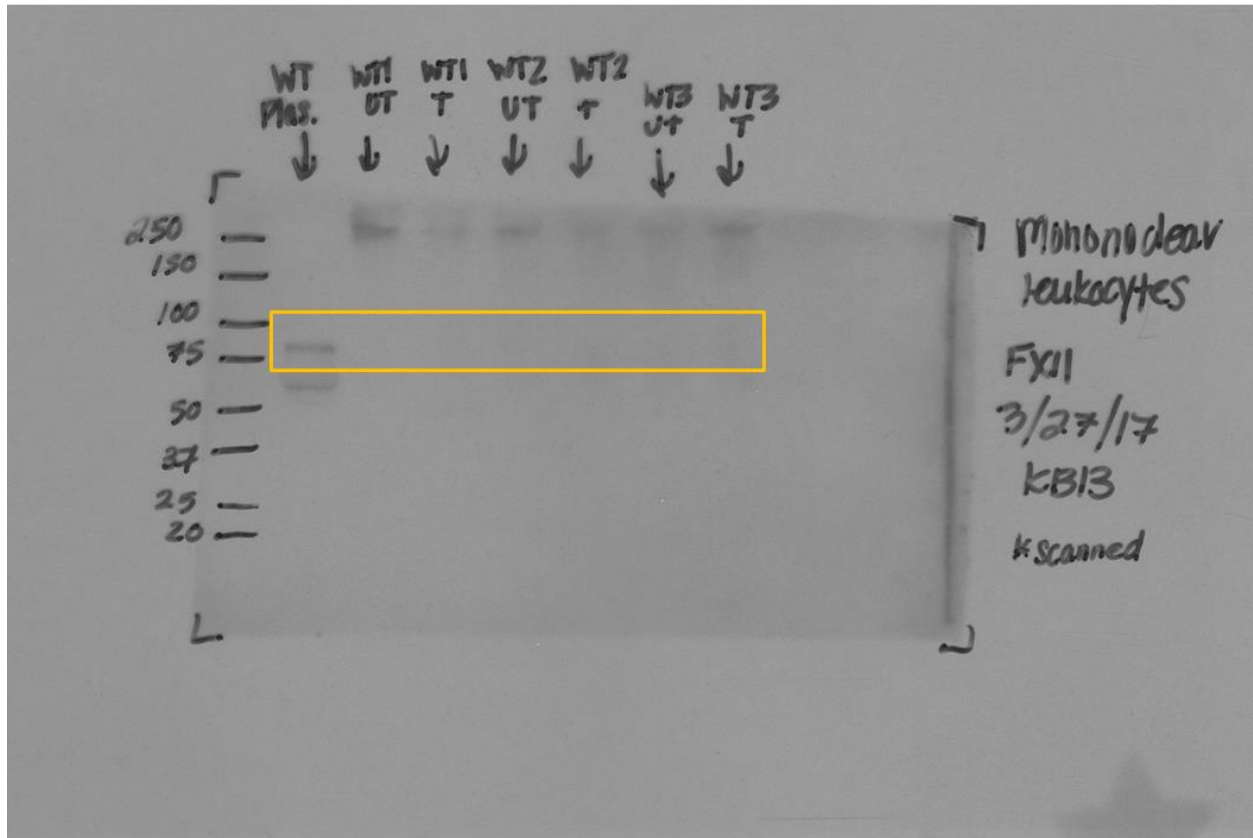

**Full Unedited Gel for Supplemental Figure 9A:  
pAkt2S<sup>474</sup> (TOP)**

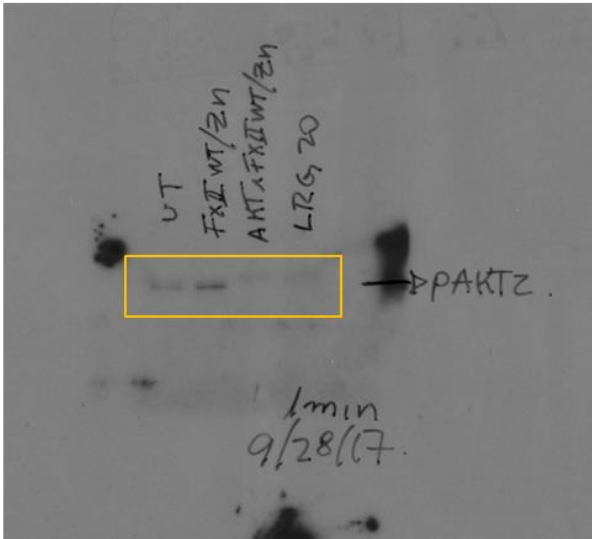

**Full Unedited Gel for Supplemental Figure 9A:  
 $\beta$ -actin (BOTTOM)**

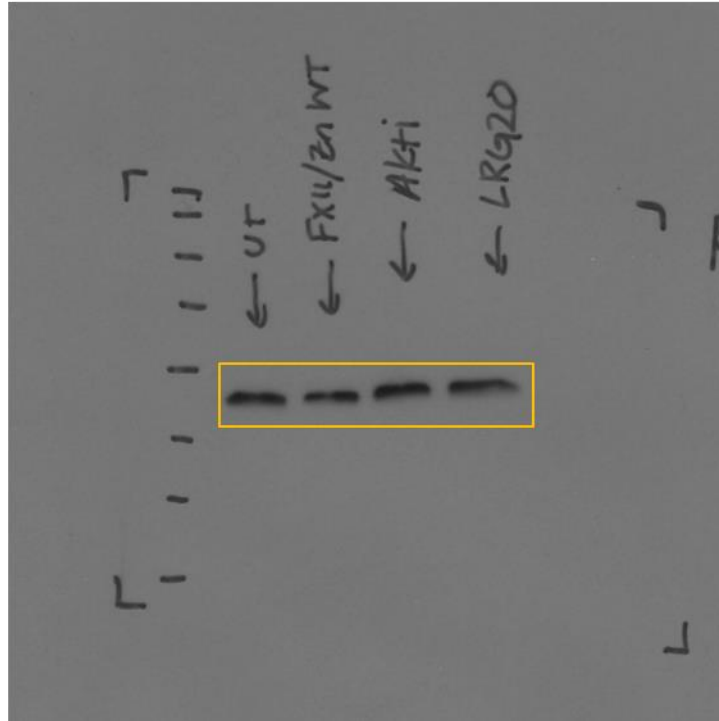

Supplement: sd1 [file 1]
